# Supplementary material for: Palladium-catalyzed amination of meso-(bromophenyl)porphyrins with diamines and azamacrocycles
Source: Royal Society of Chemistry journal article supplement (doi:10.1039/c3dt52685b), 2014-01-01

## Supporting Information for

### Palladium-catalyzed amination of *meso*-(bromophenyl)porphyrins with diamines and azamacrocycles

Elena A. Mikhailitsyna,<sup>a,c</sup> Vladimir S. Tyurin,<sup>a</sup> Victor N. Khrustalev,<sup>b</sup> Ivan S. Lonin,<sup>a</sup> Irina P. Beletskaya<sup>\*a,c</sup>

<sup>a</sup>A.N. Frumkin Institute of Physical Chemistry and Electrochemistry RAS, Leninskiy prospekt 31-4, 119071, Moscow, Russia

<sup>b</sup>INEOS RAS, Vavilova St. 28, 119991, Moscow, Russia.

<sup>c</sup>M.V. Lomonosov Moscow State University, Leninskie Gory, 1-3, 119992, Moscow, Russia

#### S1. <sup>1</sup>H and <sup>13</sup>C NMR spectra of ZnPP-1

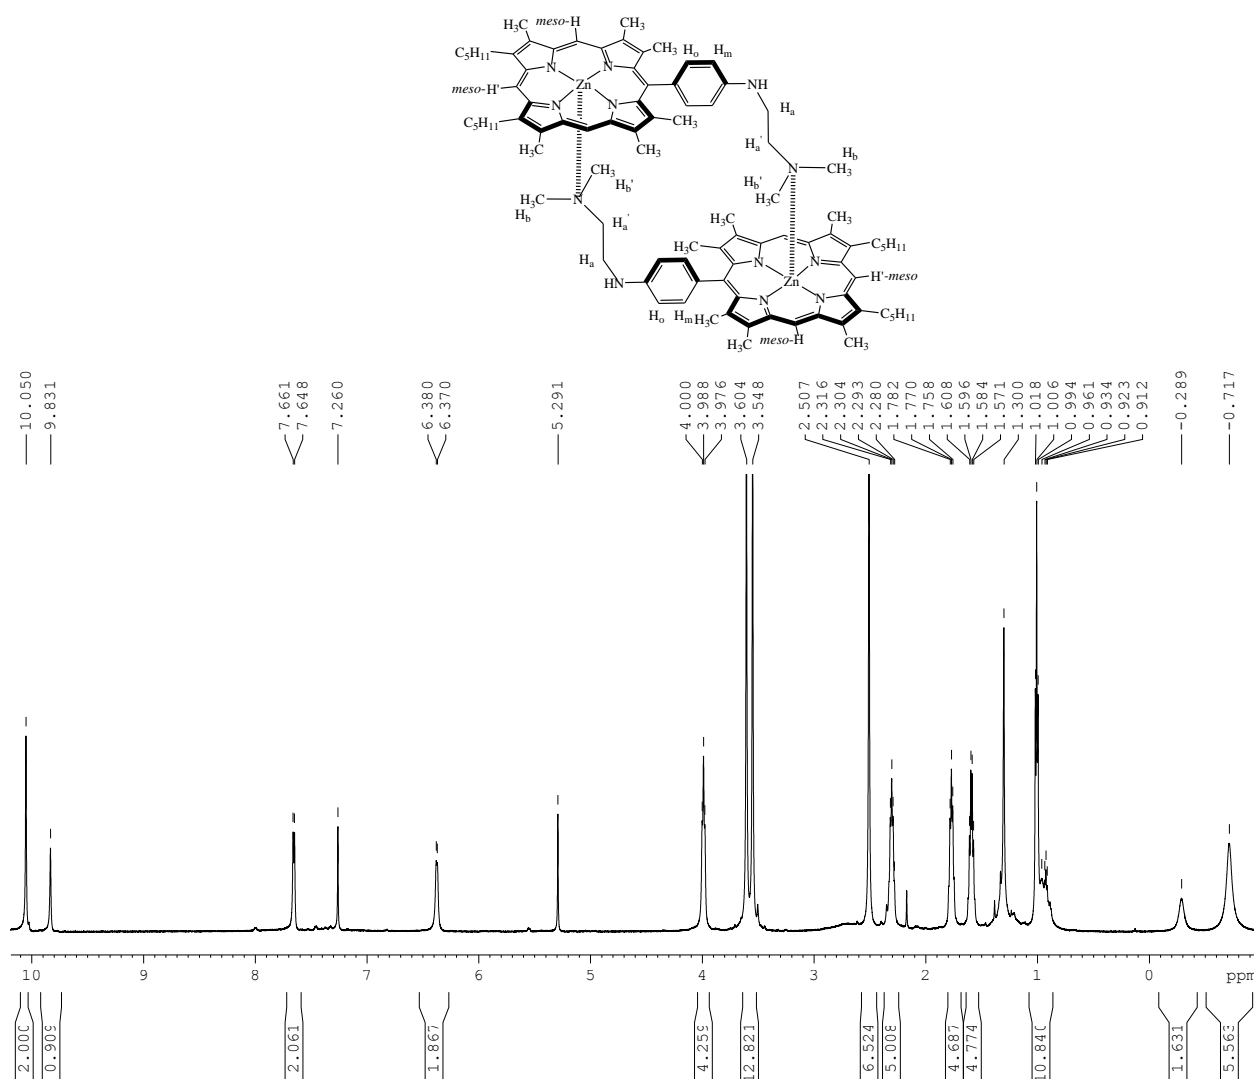

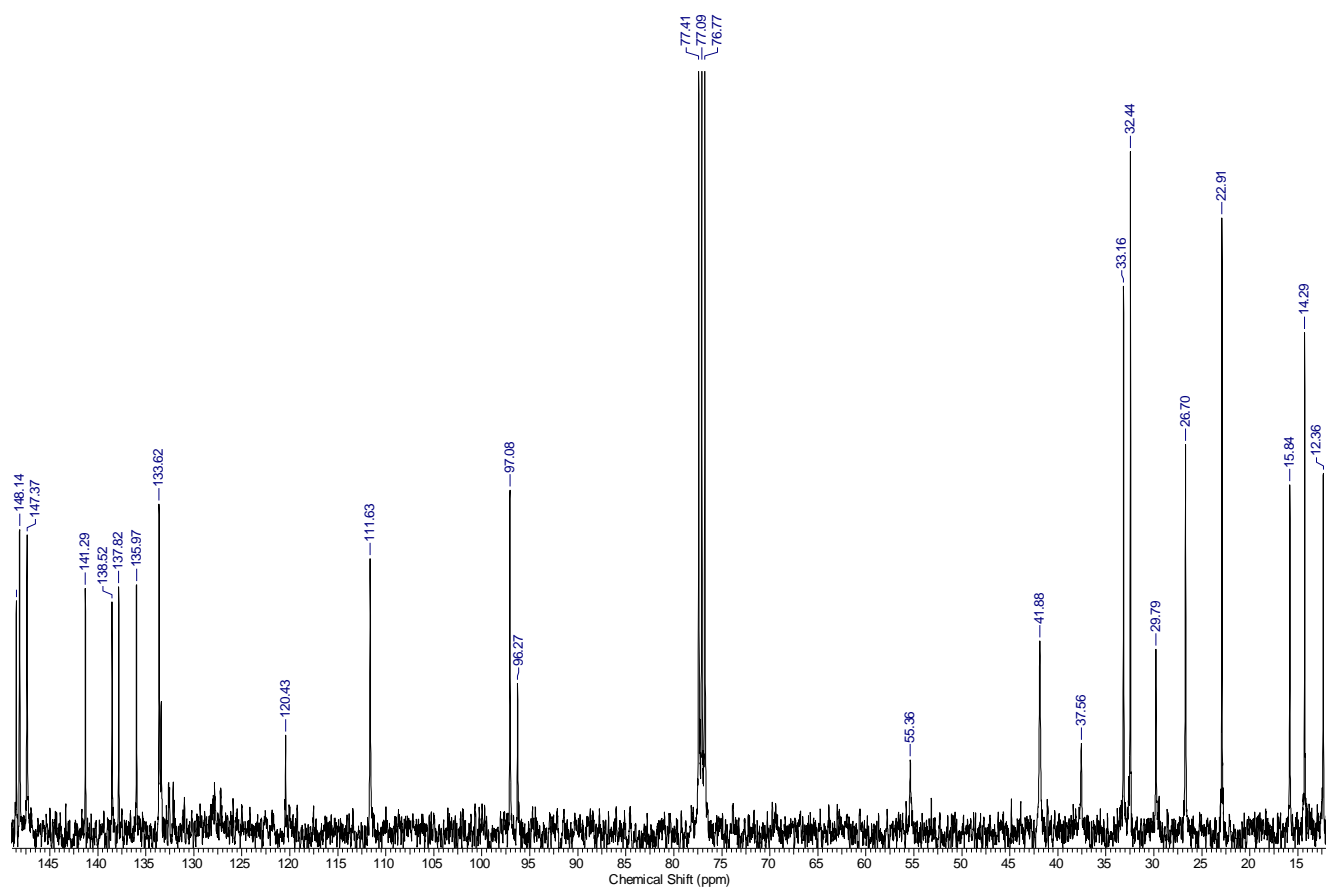

S2.  $^1\text{H}$ - $^1\text{H}$  COESY spectrum of ZnPP-1

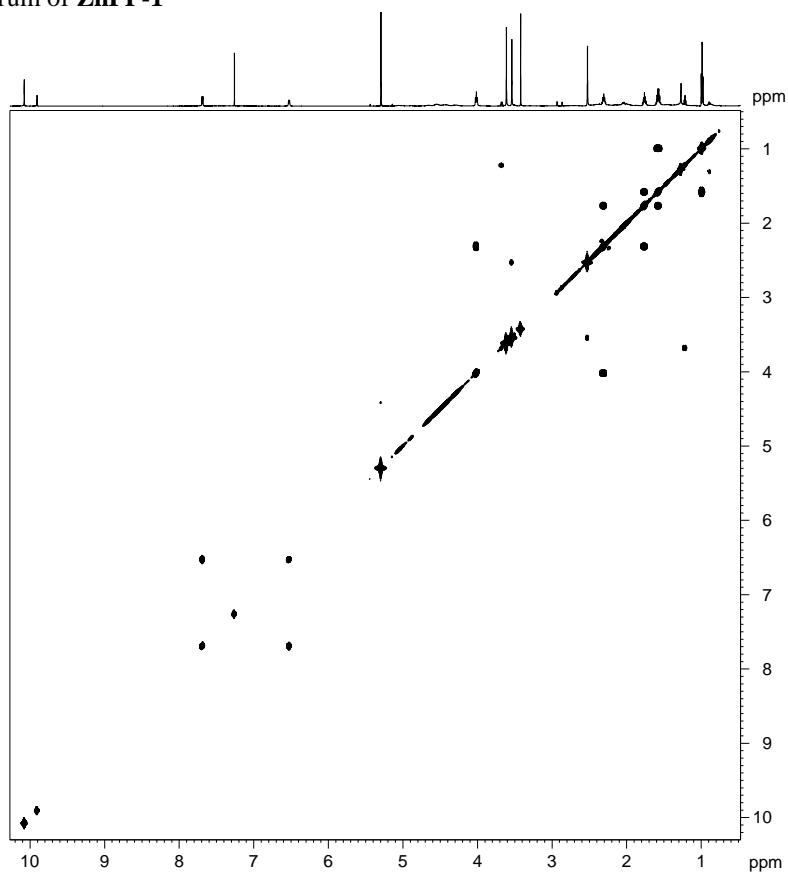

S3.  $^1\text{H}$ - $^1\text{H}$  NOESY spectrum of **ZnPP-1**

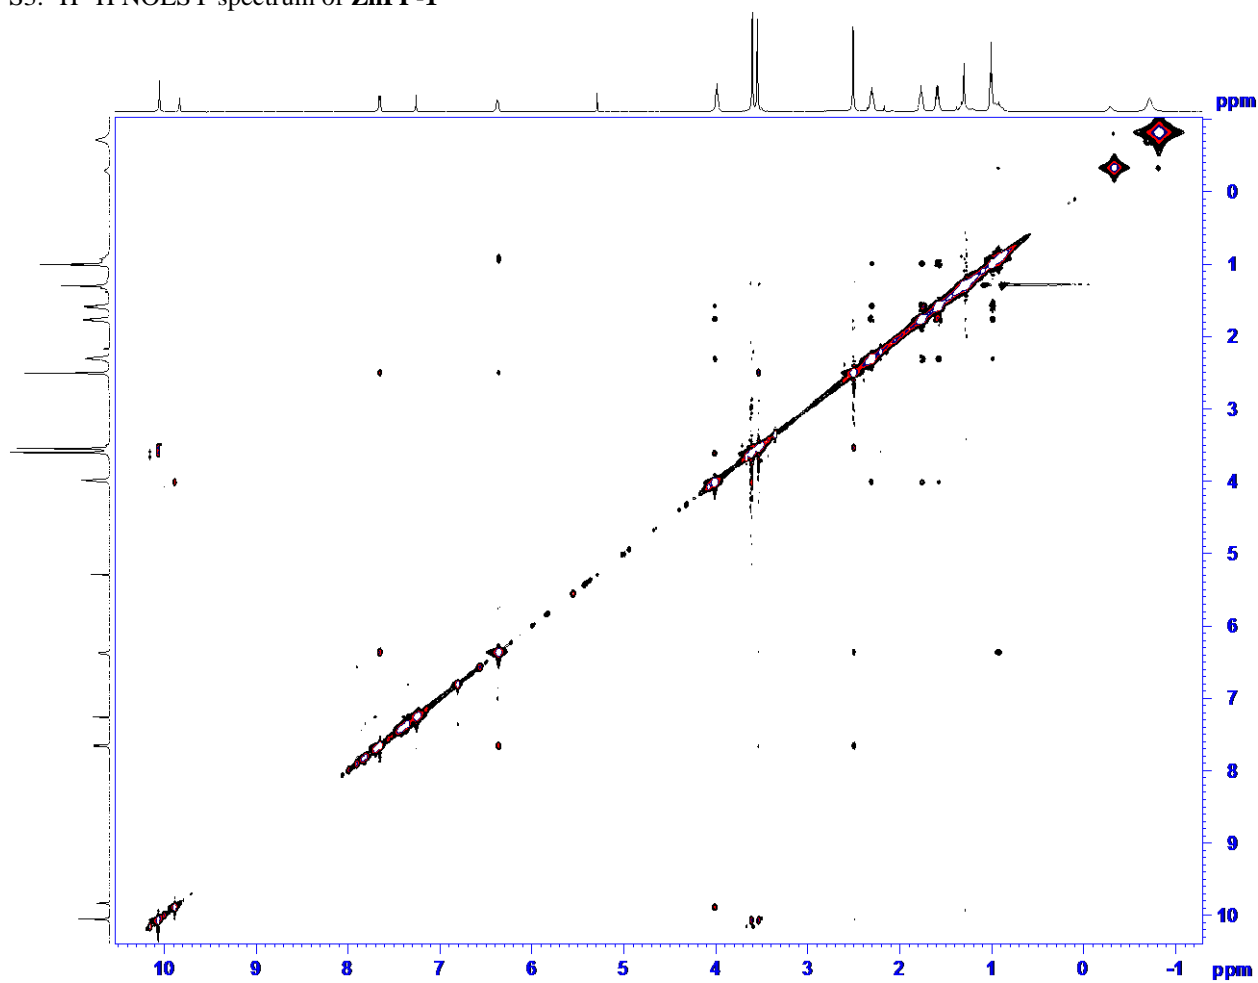

S4.  $^1\text{H}$  NMR titration of **ZnPP-1** in  $\text{CDCl}_3$  with  $\text{CF}_3\text{COOH}$

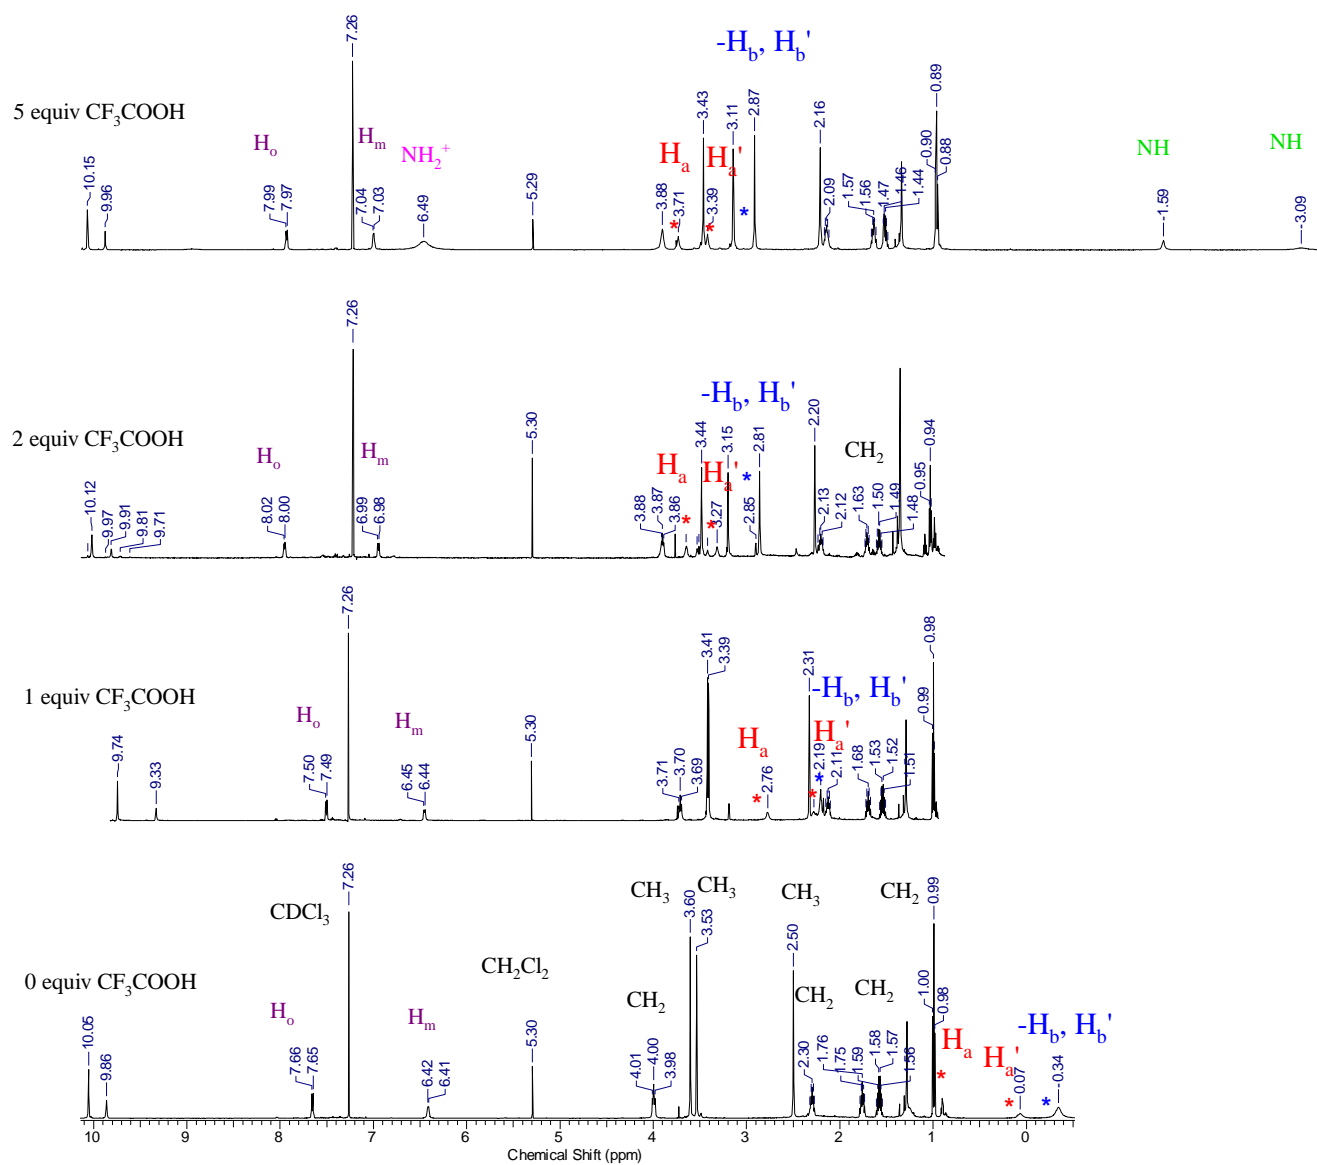

S5.  $^1\text{H}$  and  $^{13}\text{C}$  NMR spectra of ZnPP-2

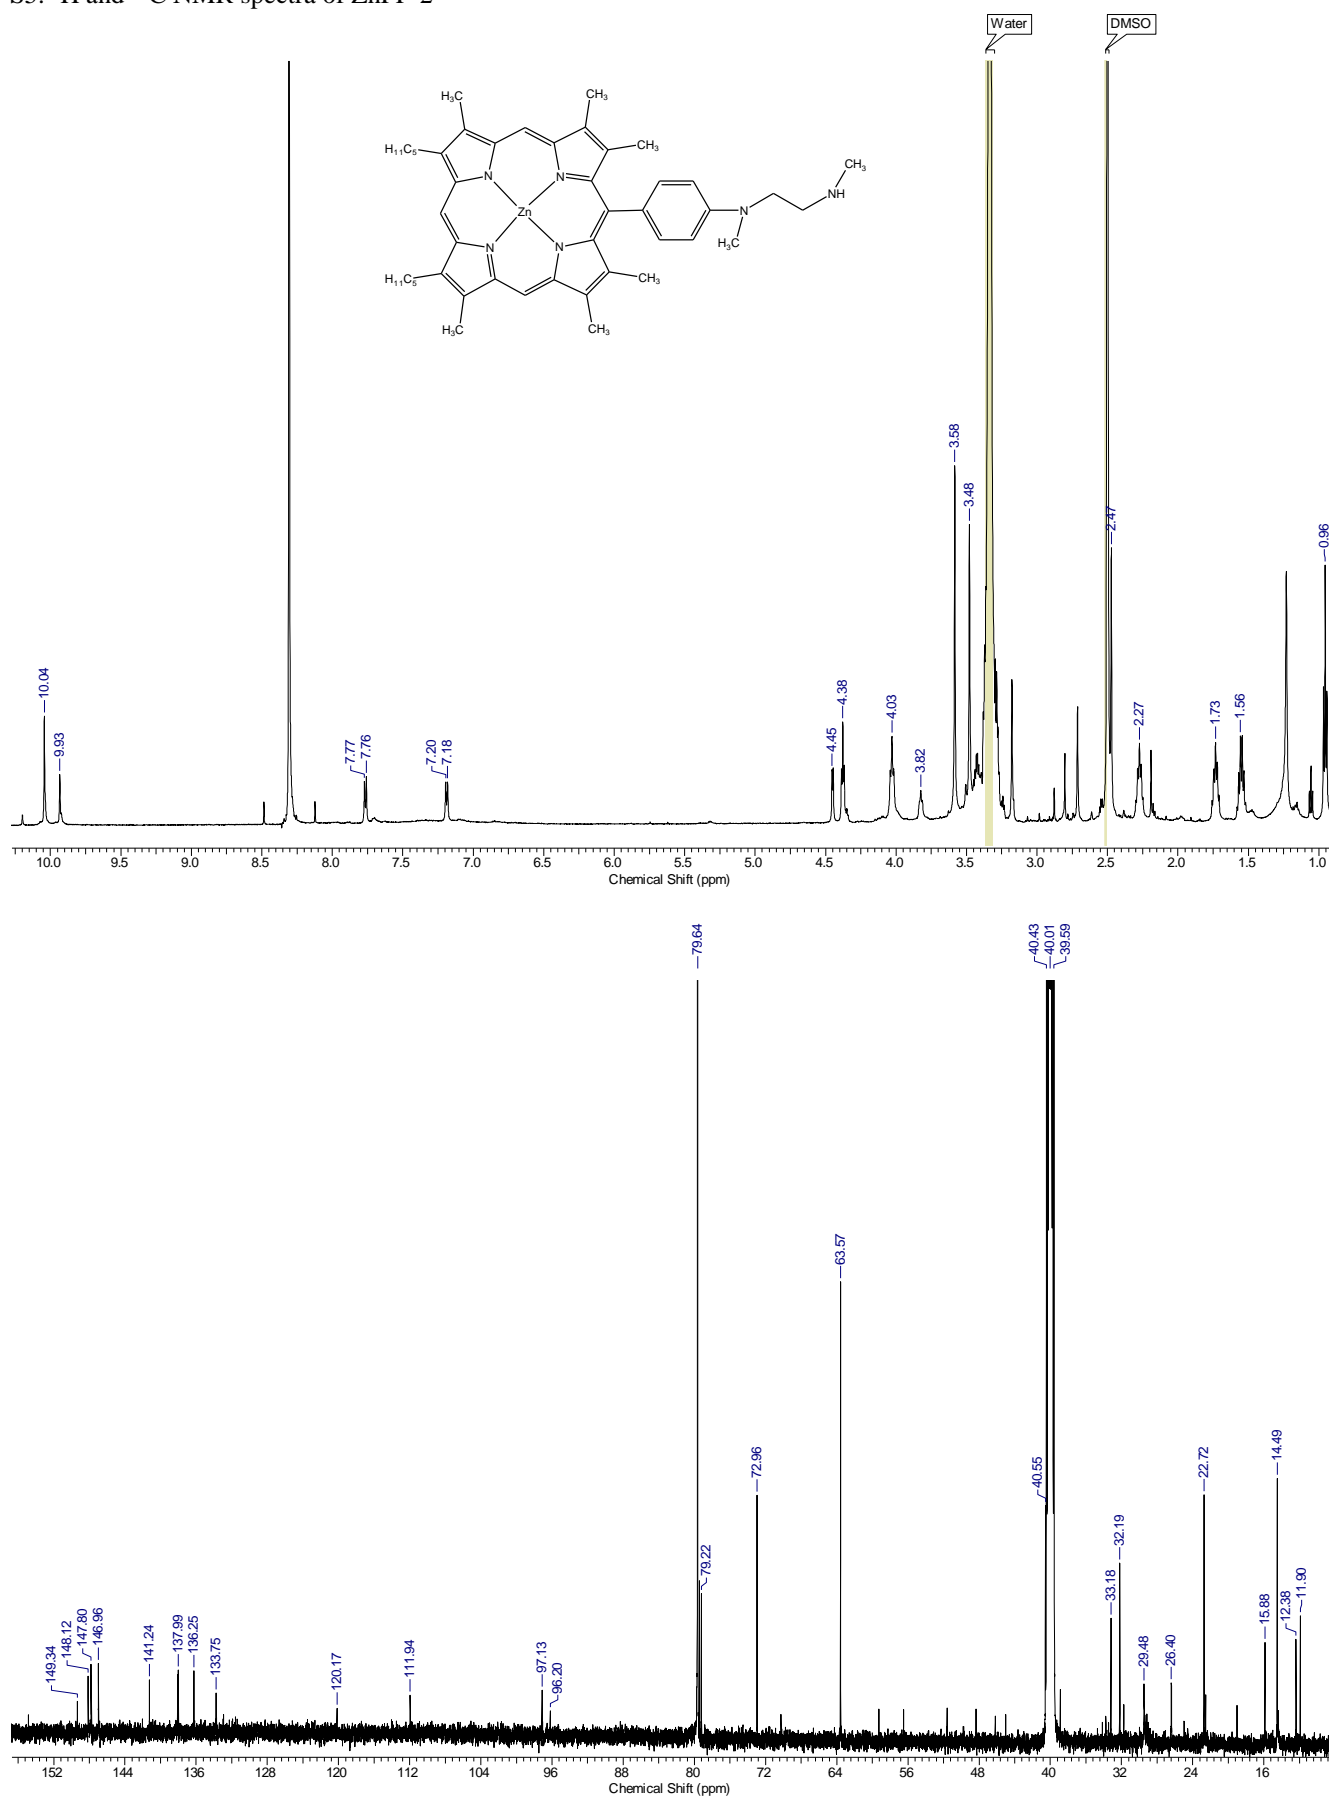

S6.  $^1\text{H}$  and  $^{13}\text{C}$  spectra ZnPP-3

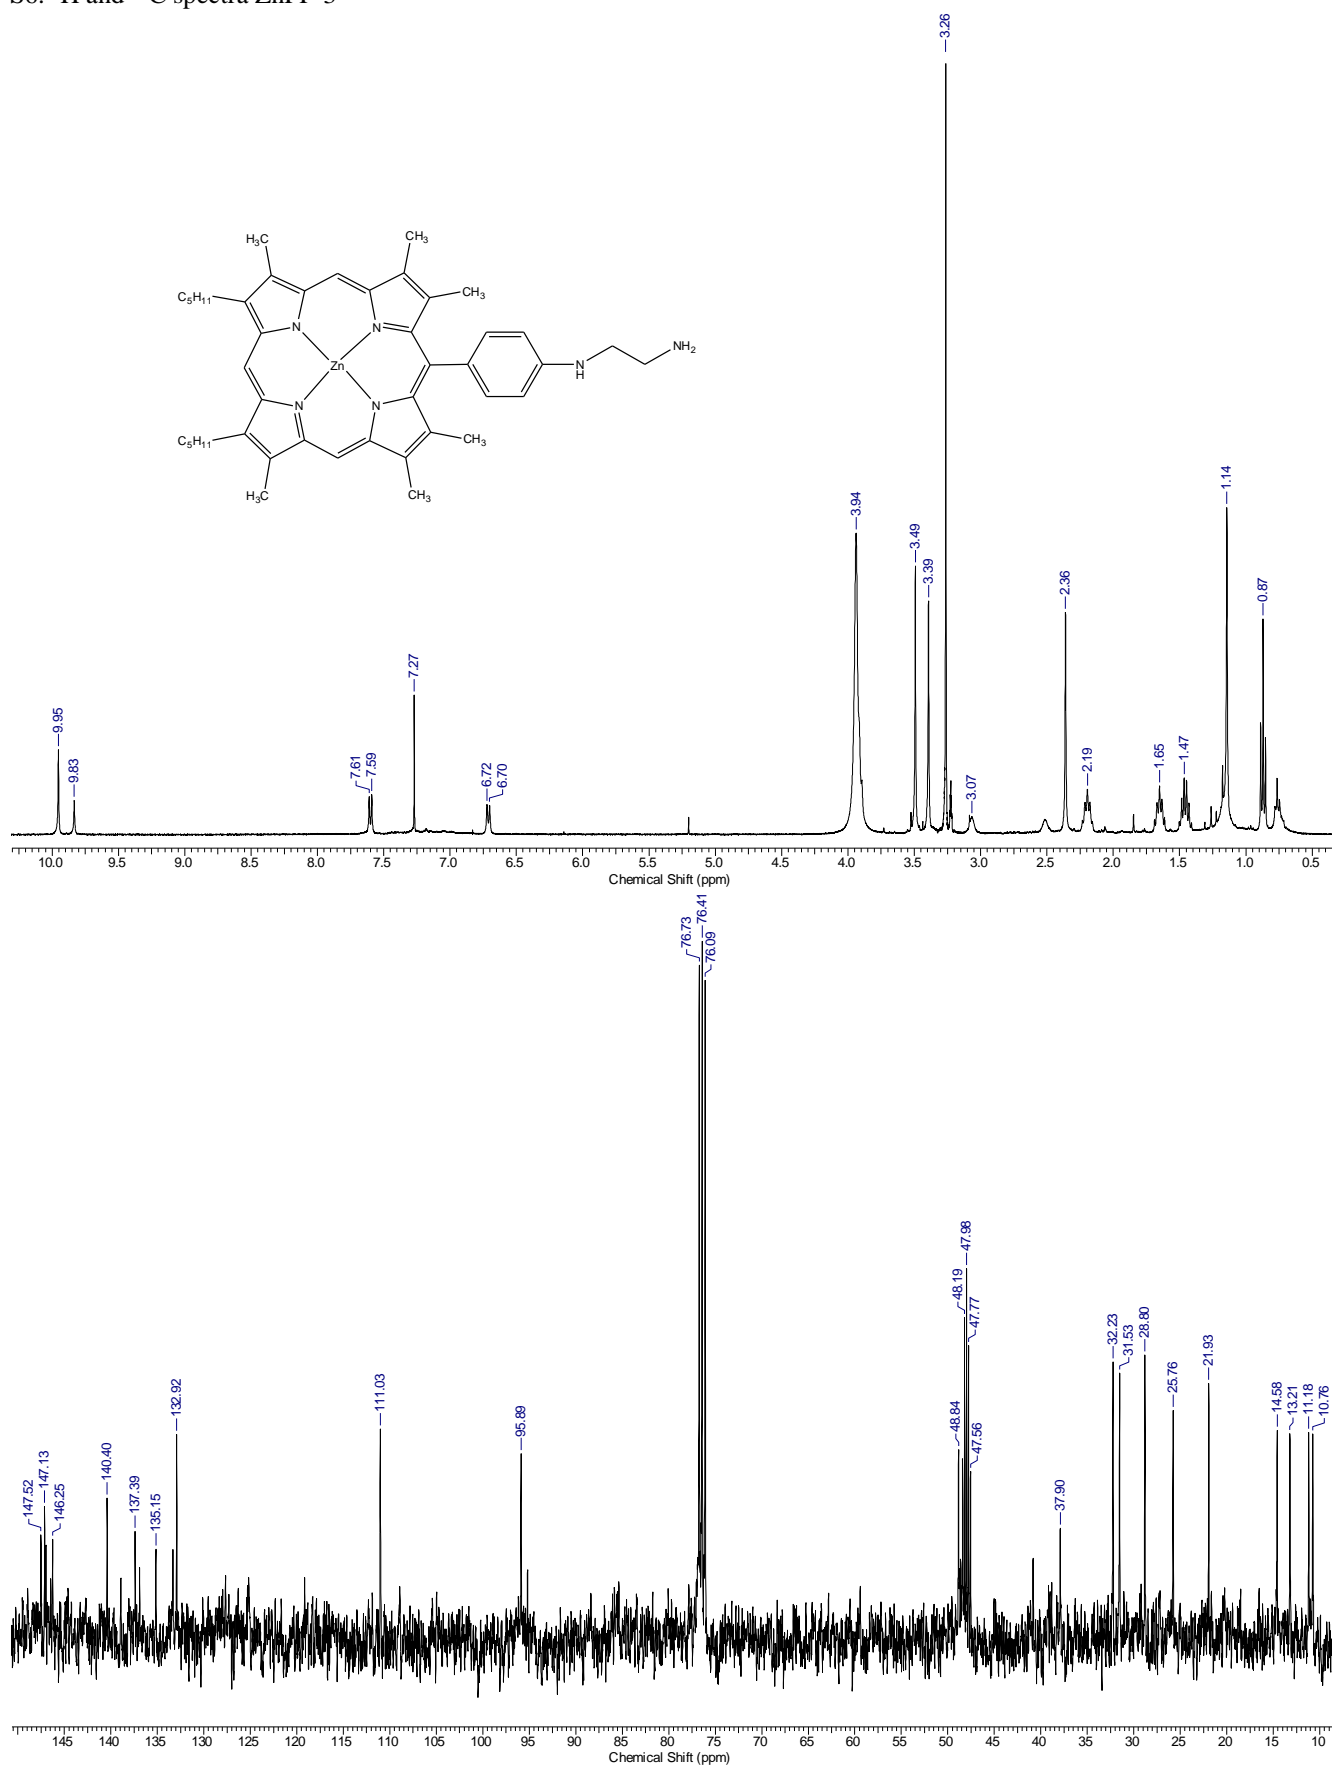

S7.  $^1\text{H}$  and  $^{13}\text{C}$  NMR spectra of ZnPP-4

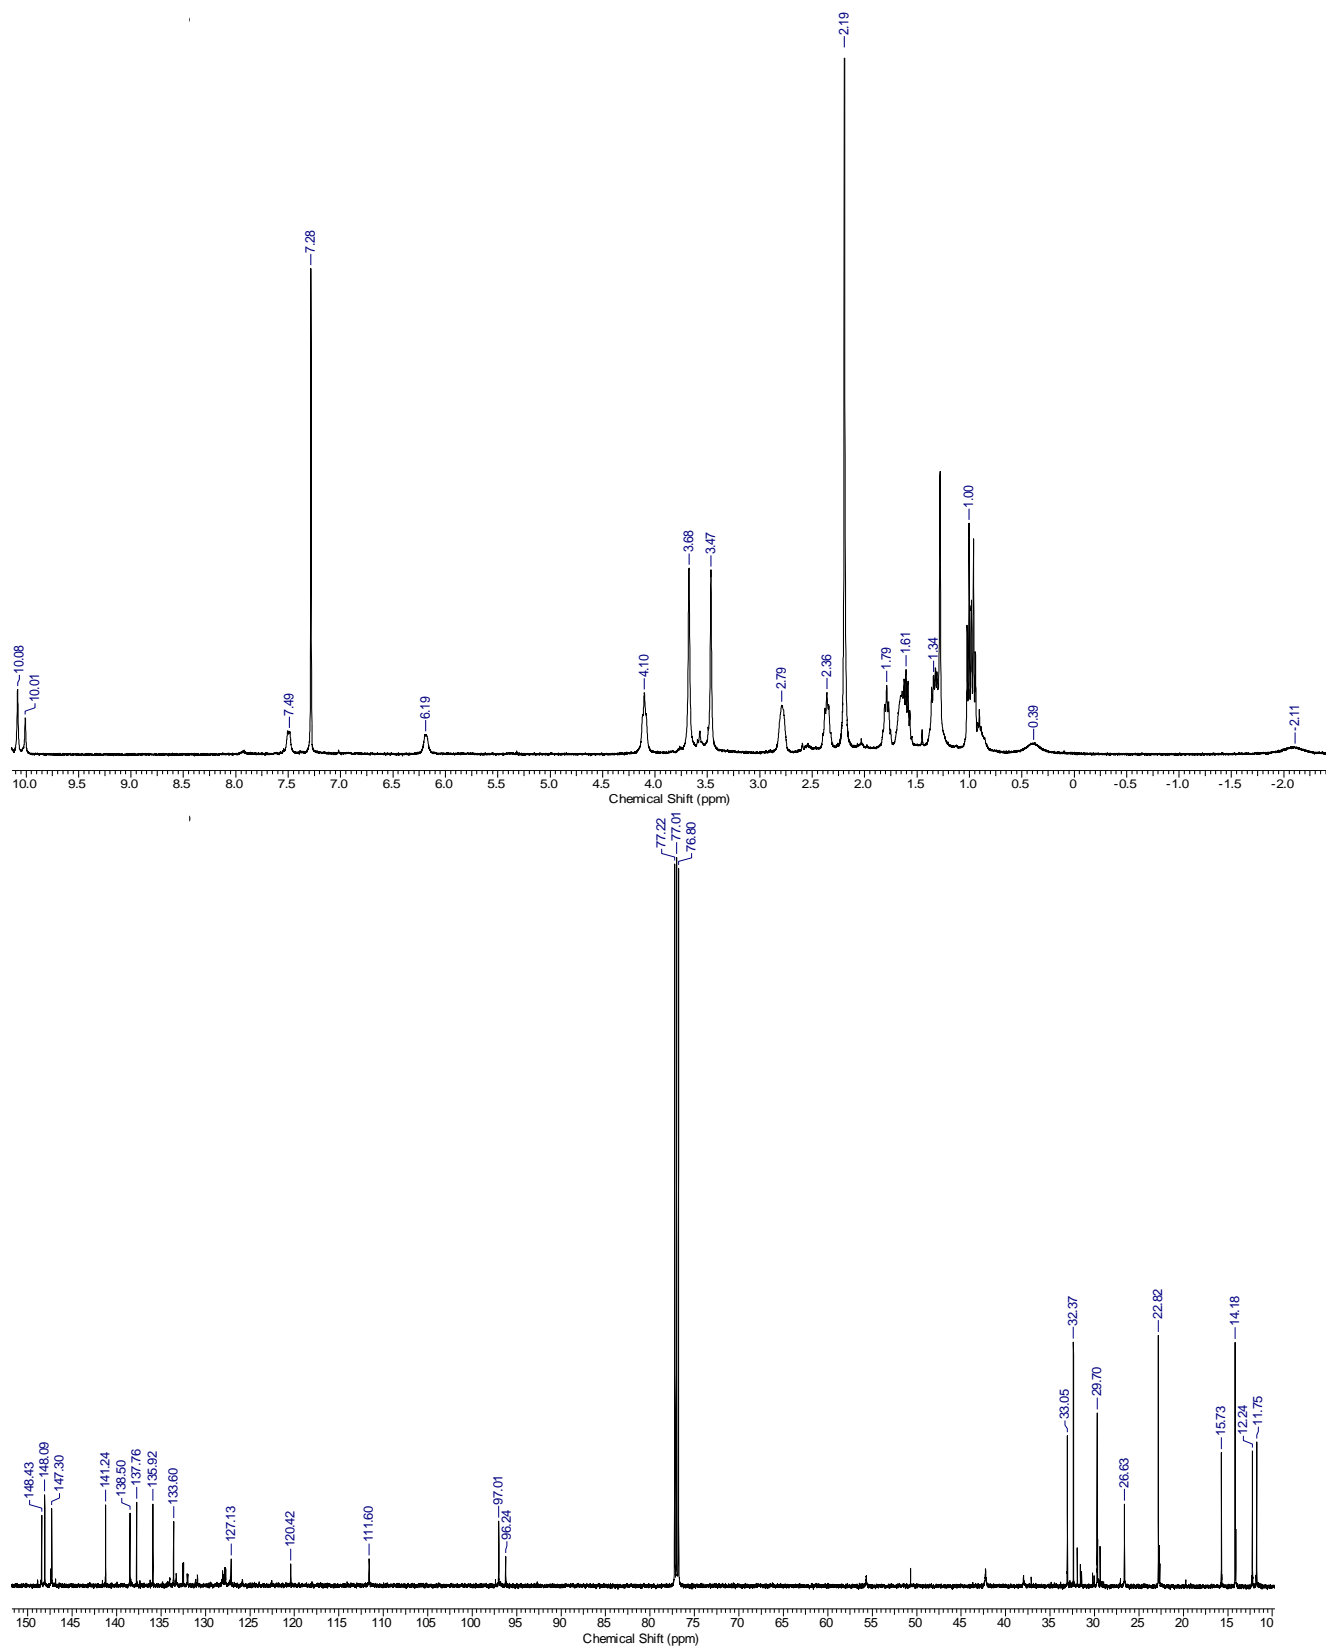

S8.  $^1\text{H}$ - $^1\text{H}$  NOESY spectrum of **ZnPP-4**

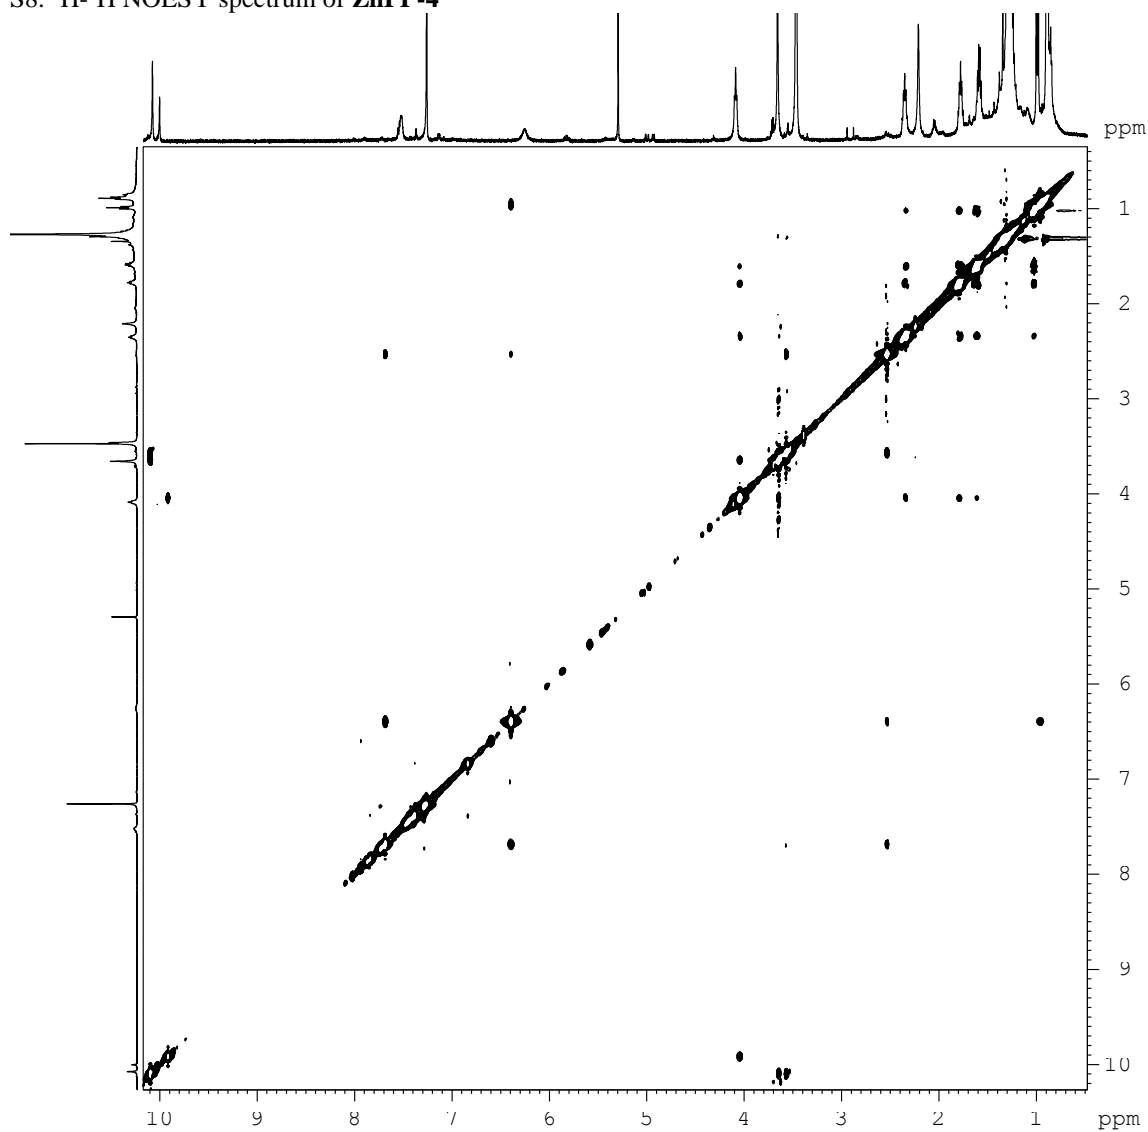



S9.  $^1\text{H}$  and  $^{13}\text{C}$  NMR spectra of ZnPP-5

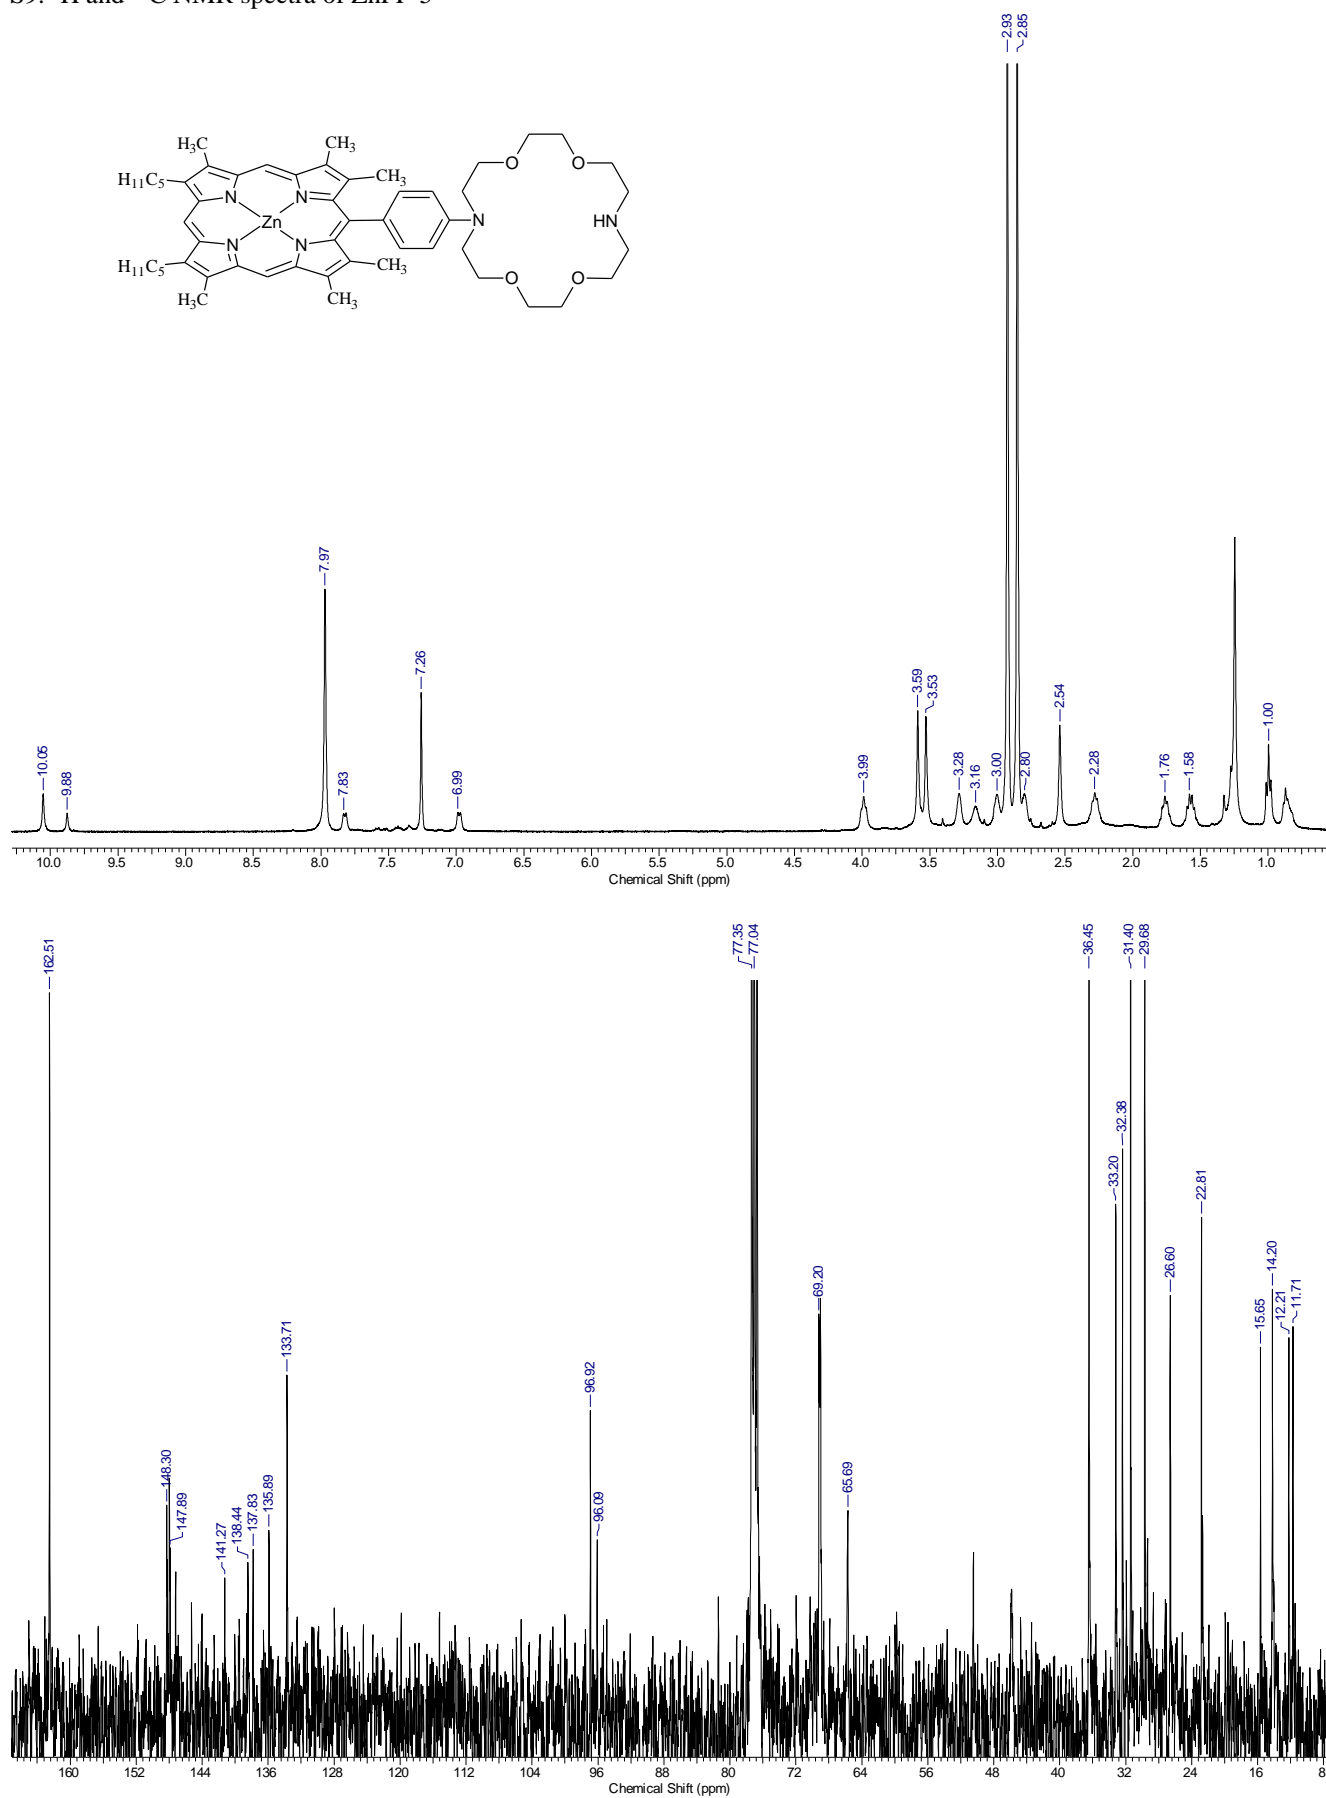

S10.  $^1\text{H}$  and  $^{13}\text{C}$  NMR spectra of ZnPP-6

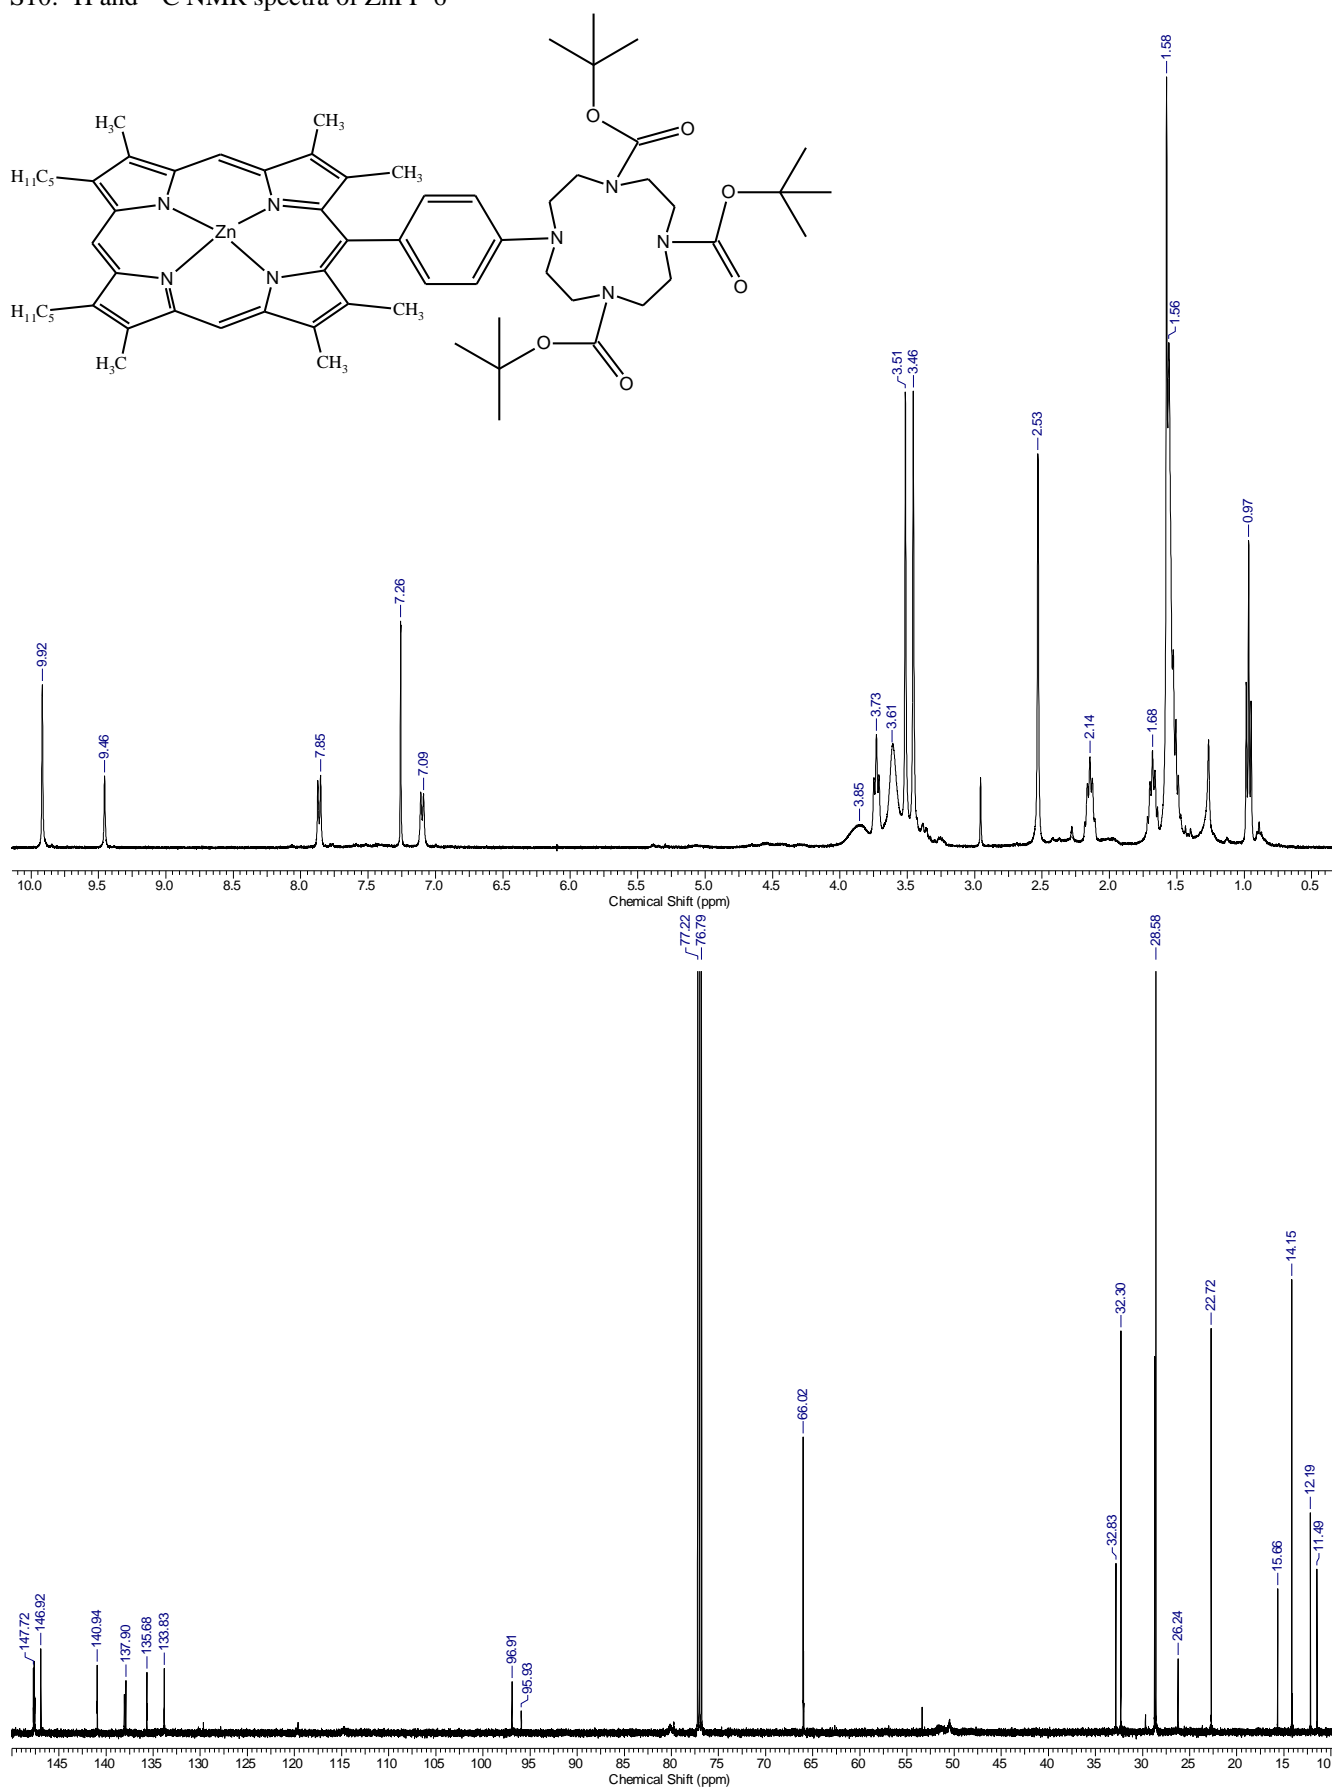

S11.  $^1\text{H}$  and  $^{13}\text{C}$  spectra of ZnDPP-1

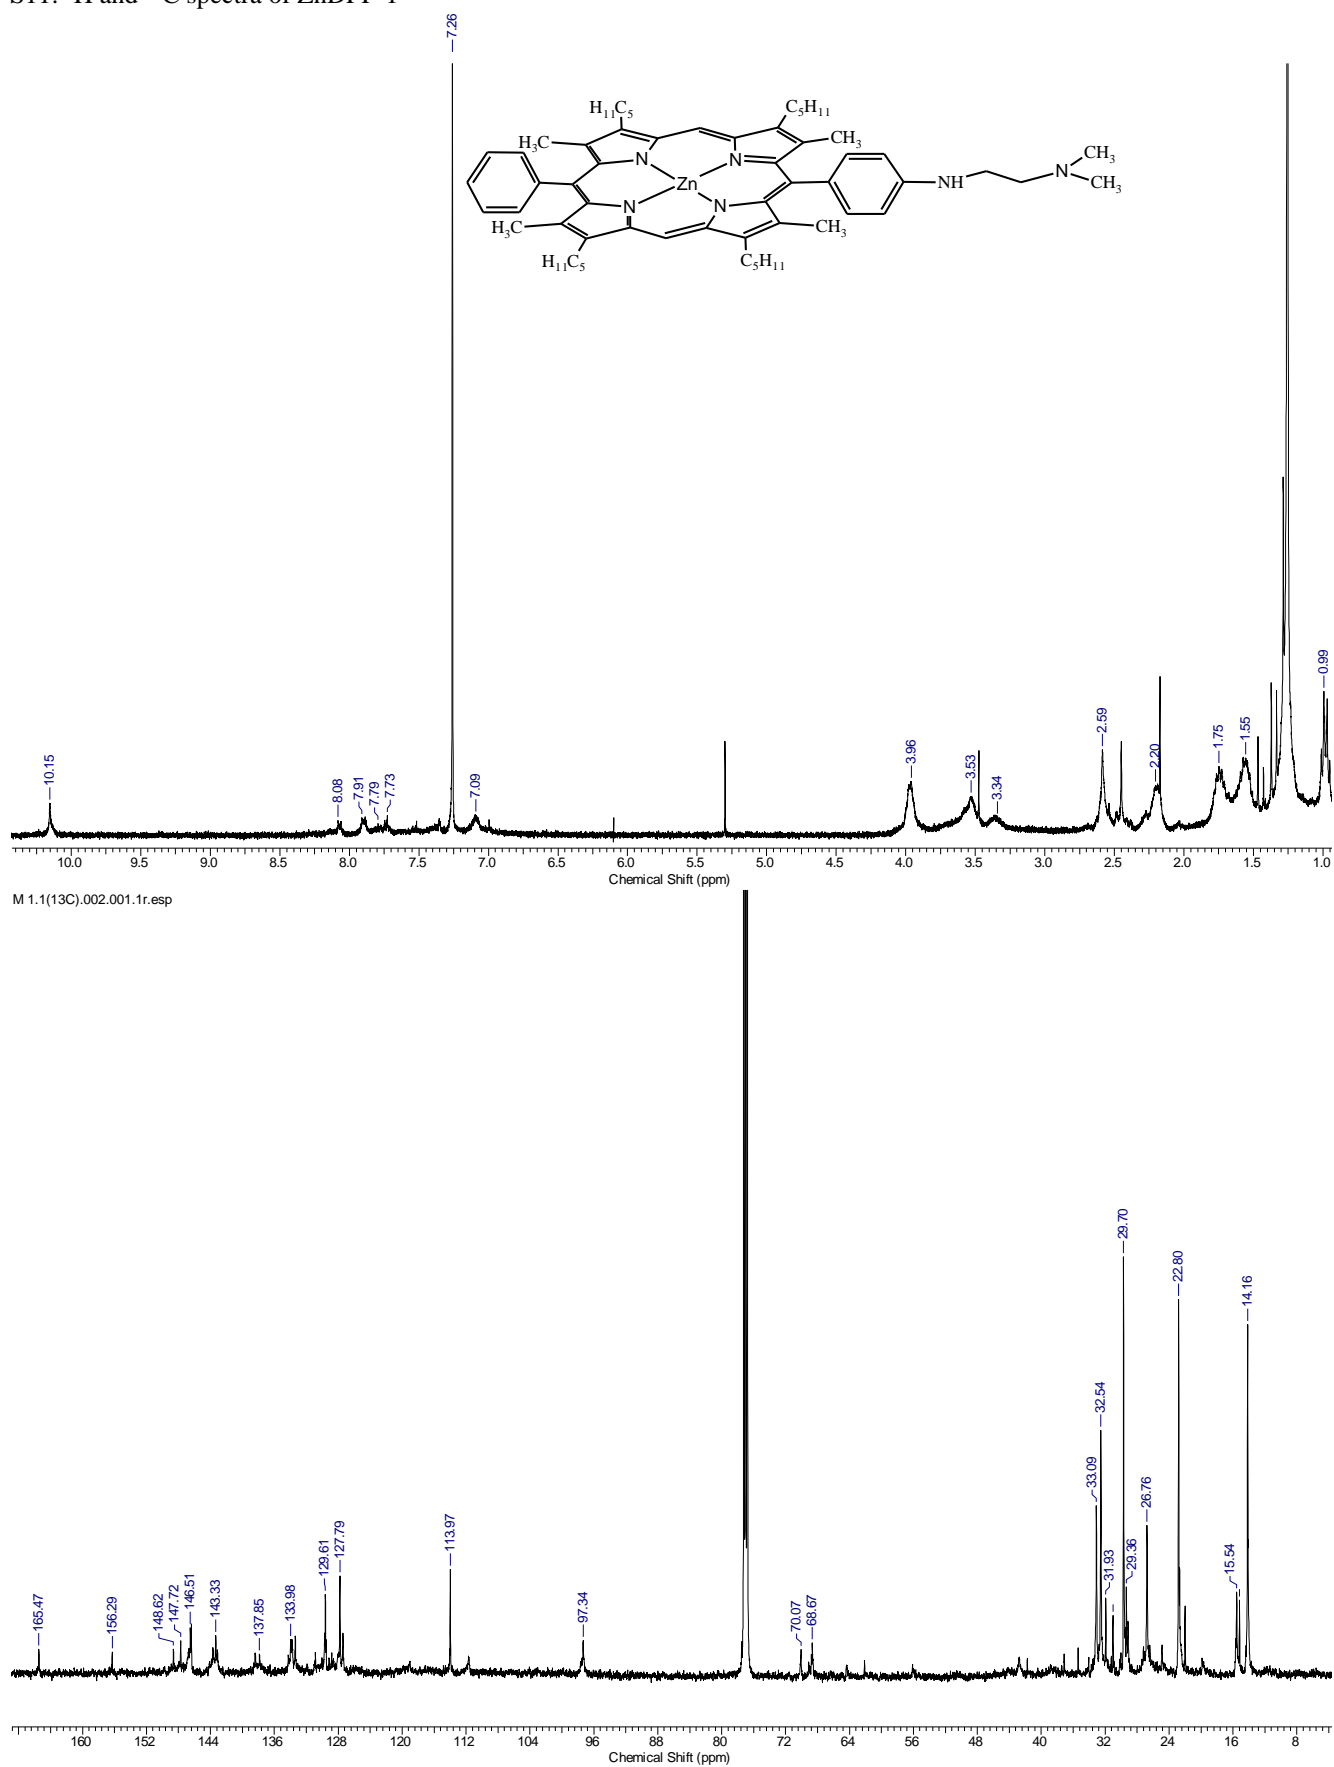

S12.  $^1\text{H}$  and  $^{13}\text{C}$  spectra ZnDPP-1,1

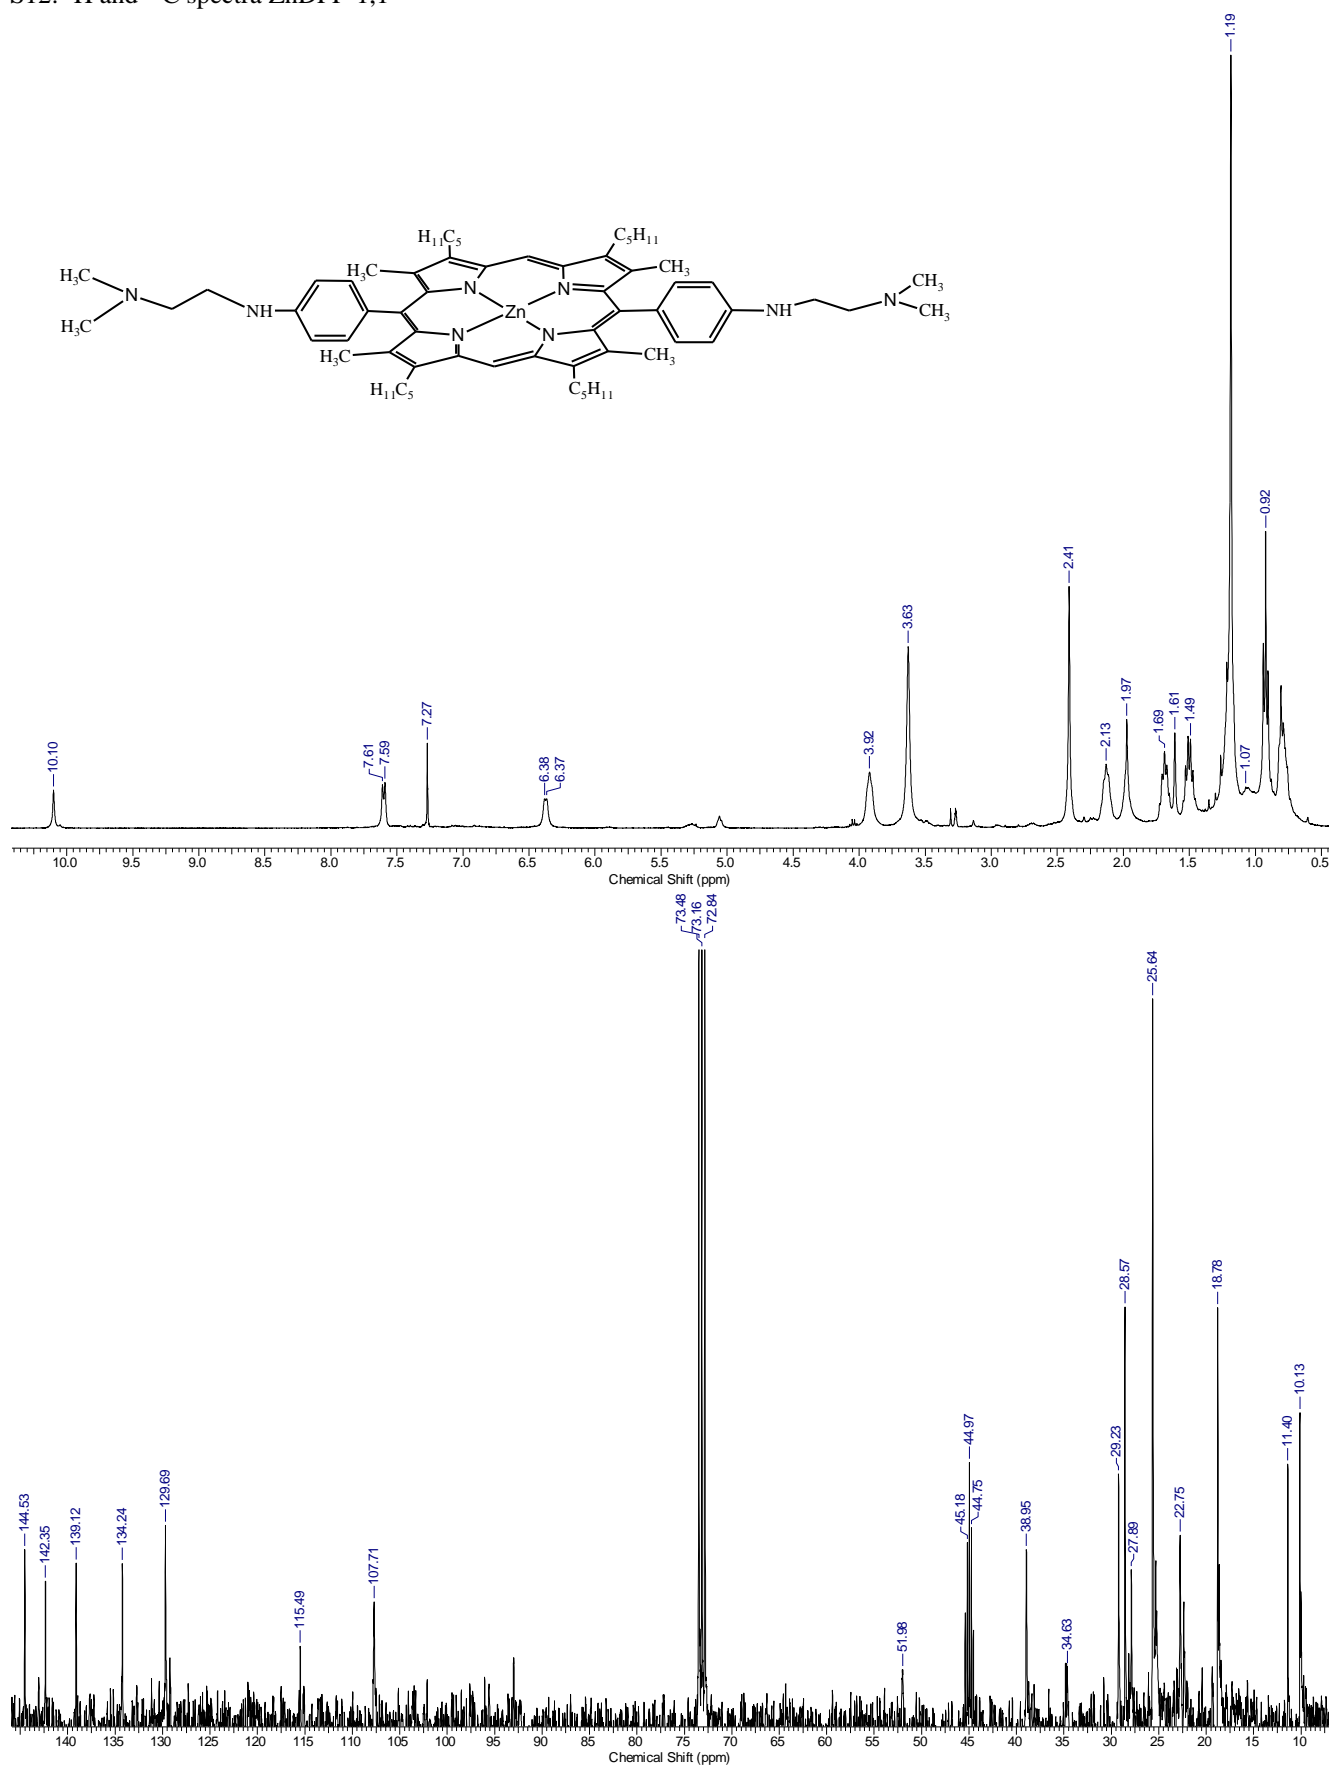

S13.  $^1\text{H}$  and  $^{13}\text{C}$  NMR spectra of ZnDPP-4

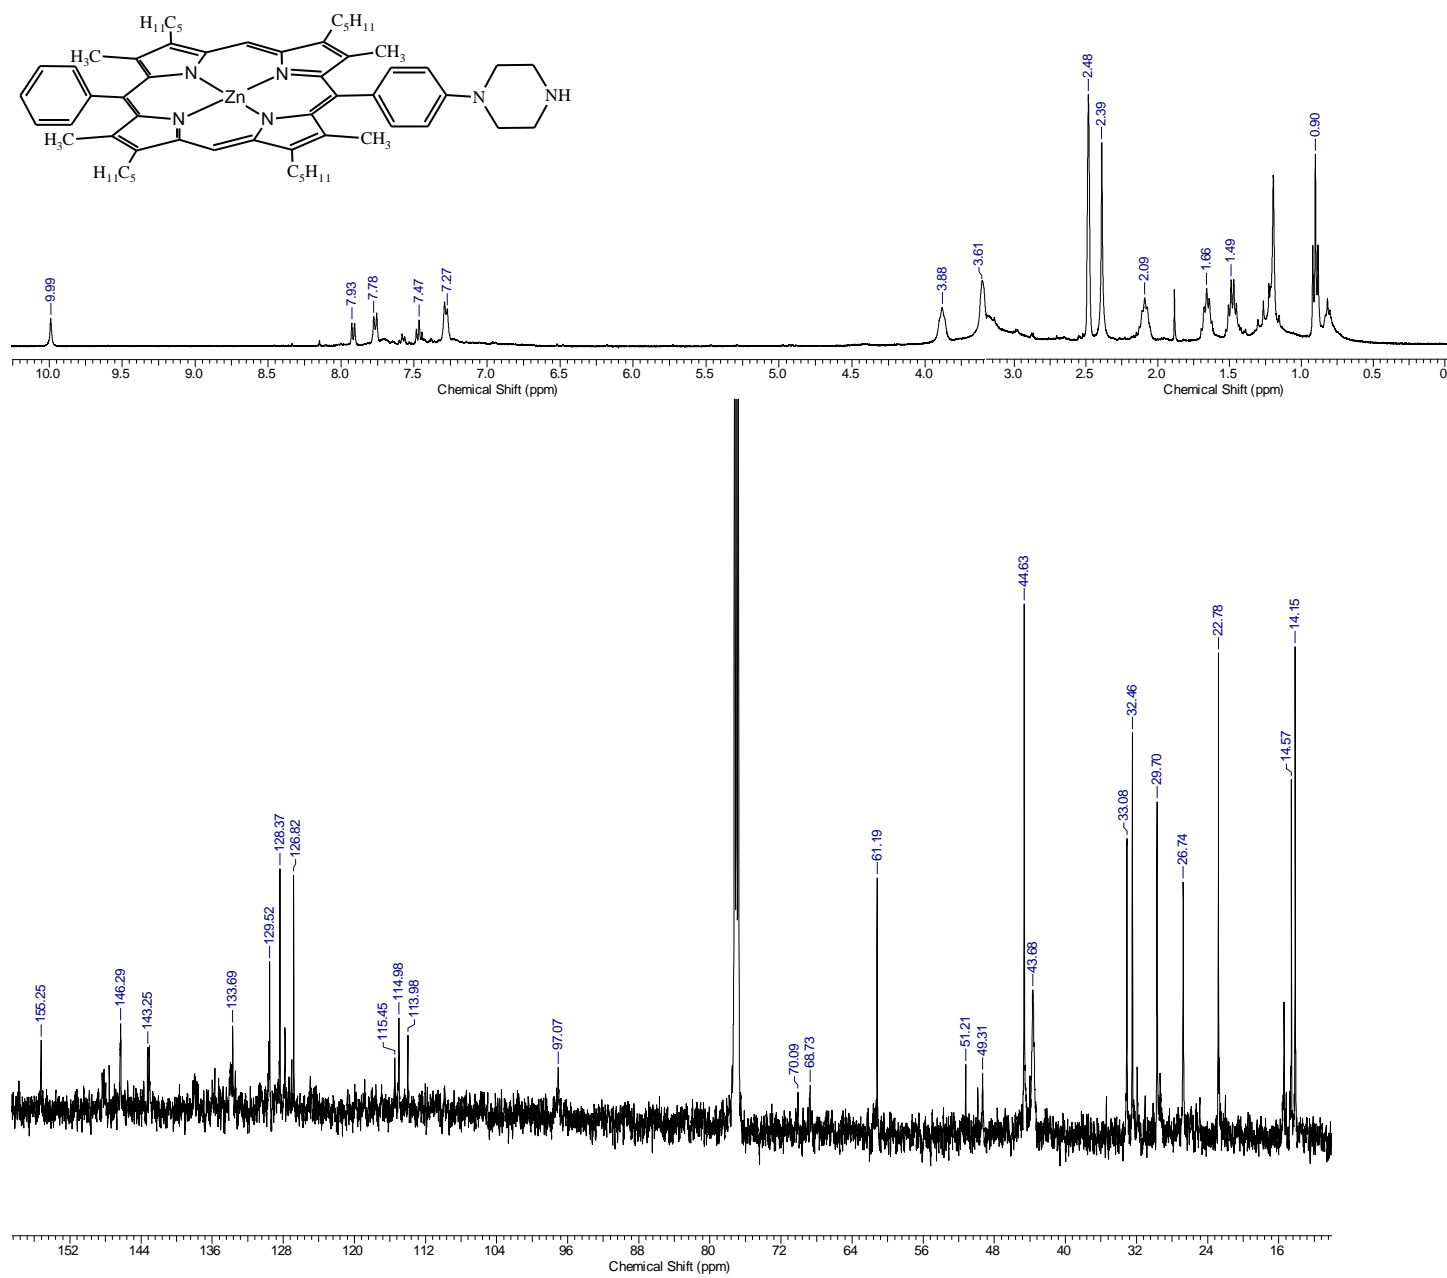

S14.  $^1\text{H}$  and  $^{13}\text{C}$  NMR spectra of ZnDPP-4,4 in  $\text{CDCl}_3\text{-d}_1$

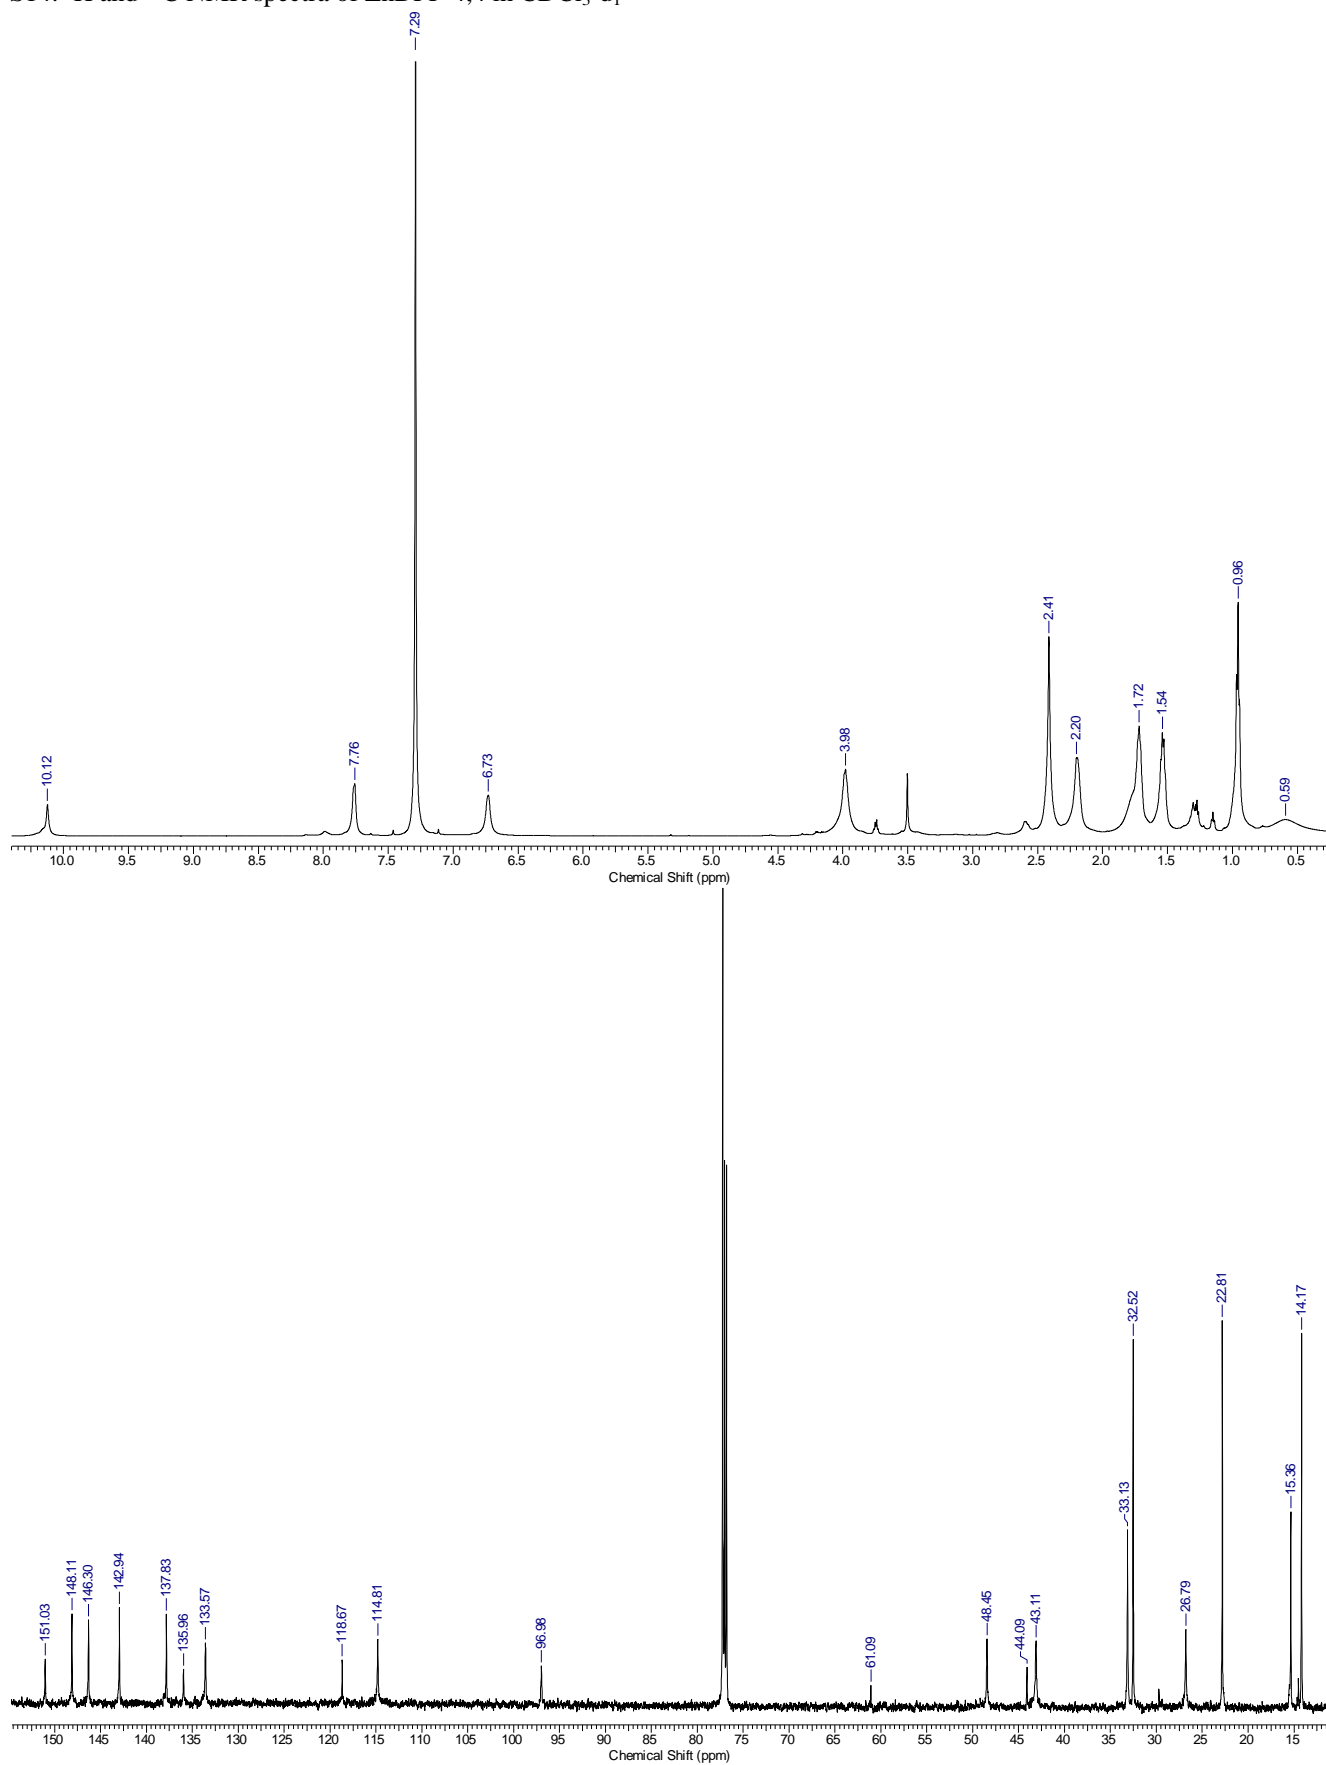

S15.  $^1\text{H}$  and  $^{13}\text{C}$  NMR spectra of ZnDPP-5

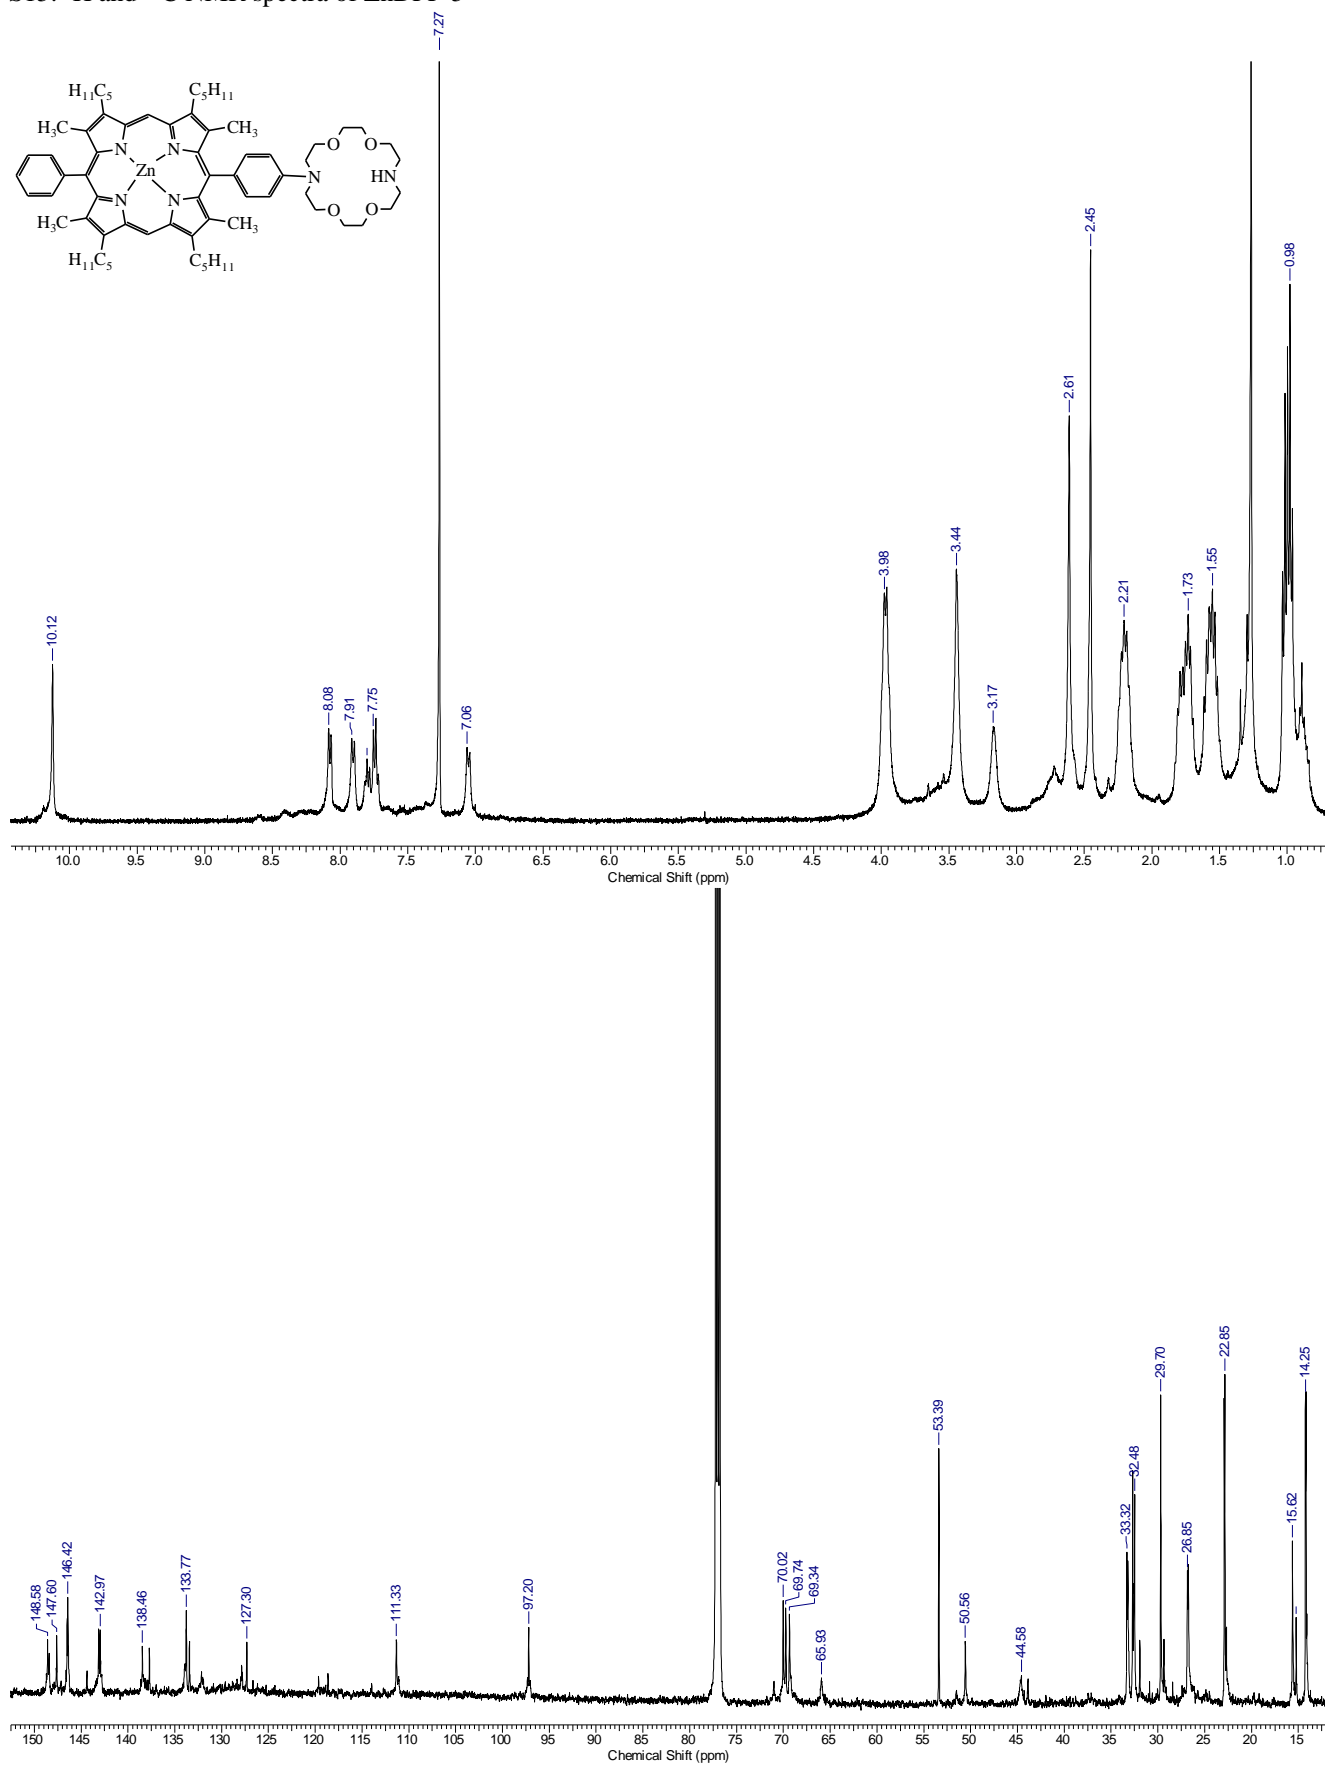

S16.  $^1\text{H}$  and  $^{13}\text{C}$  NMR spectra of ZnDPP-5,5

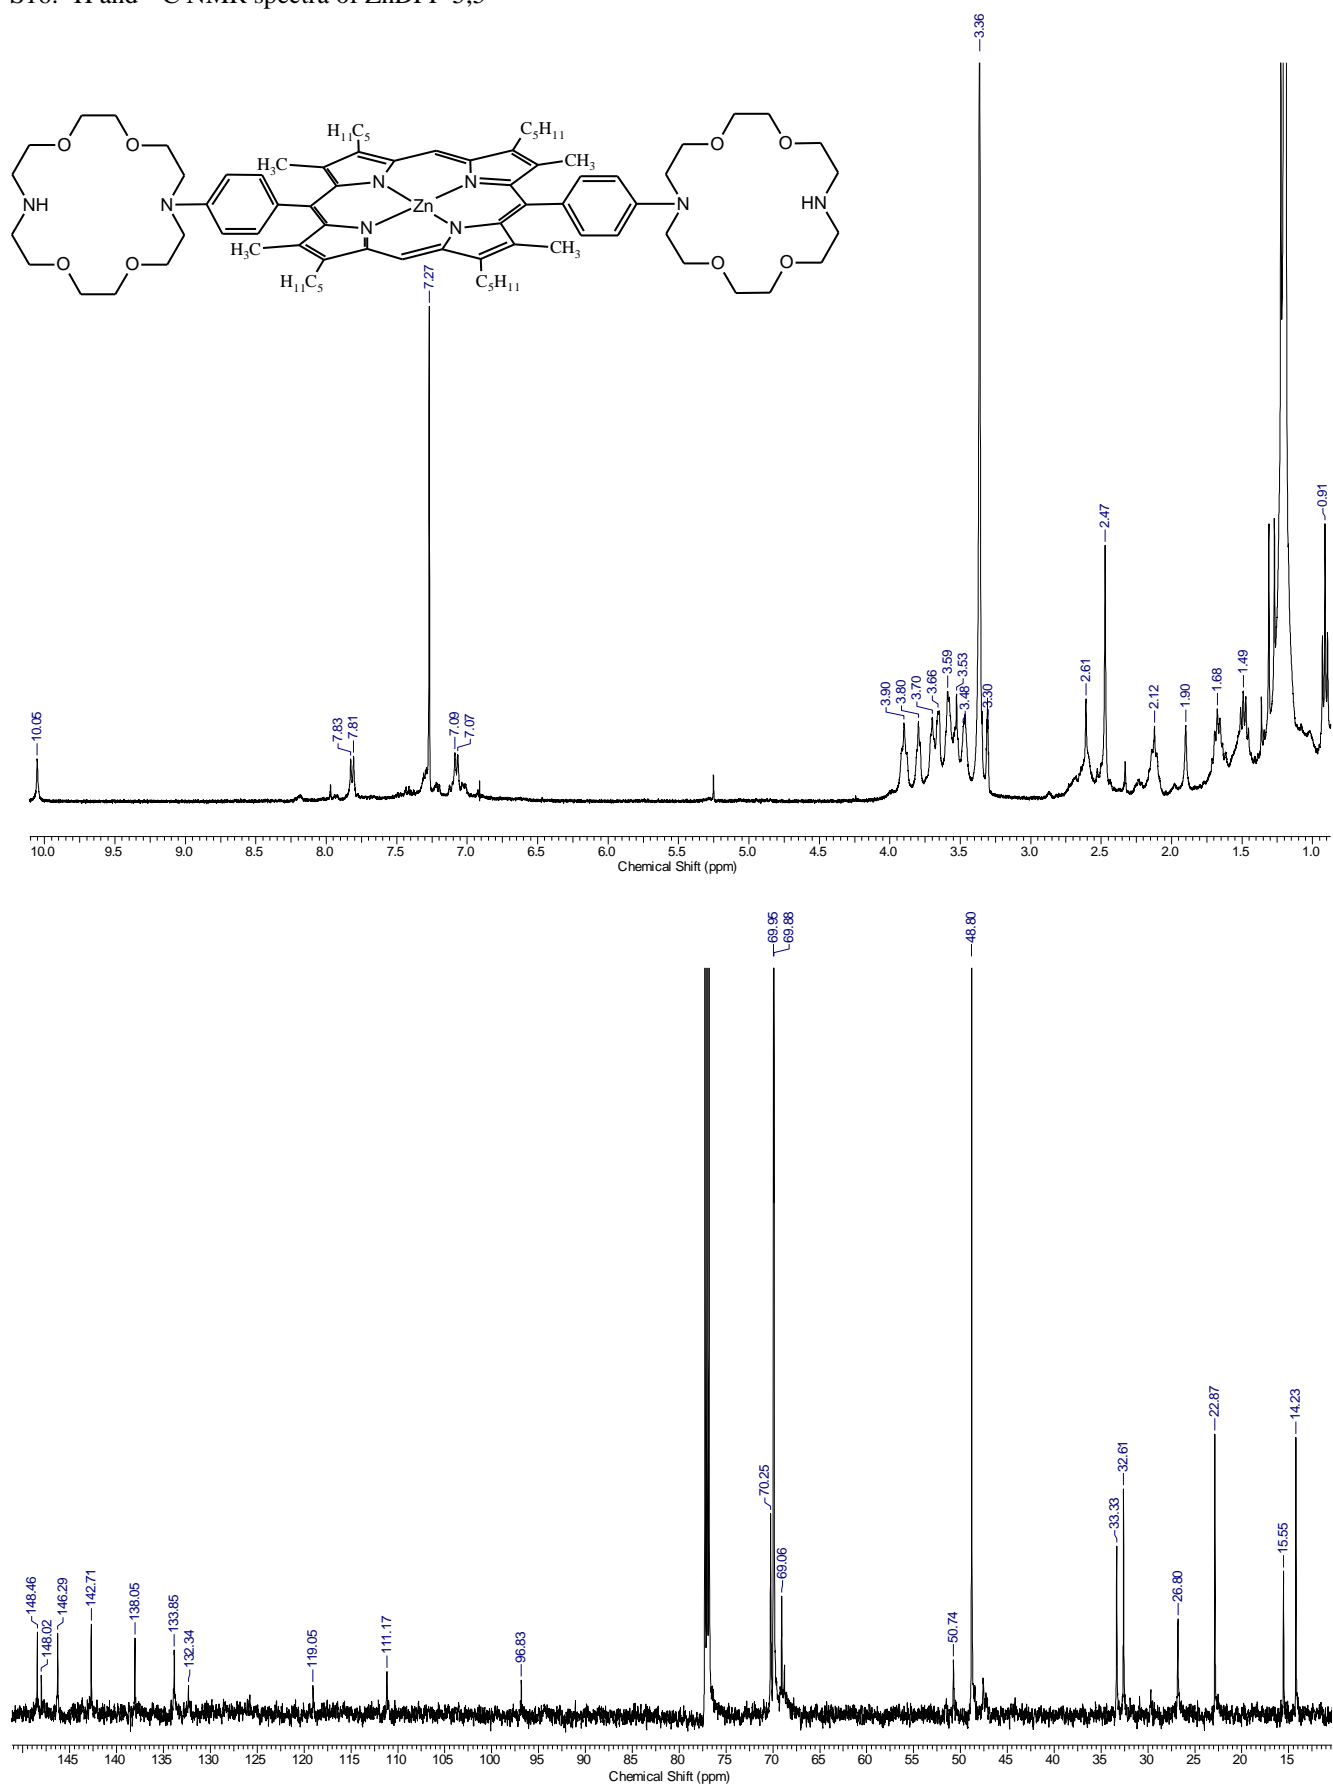



S17.  $^1\text{H}$  and  $^{13}\text{C}$  NMR spectra of ZnDPP-6

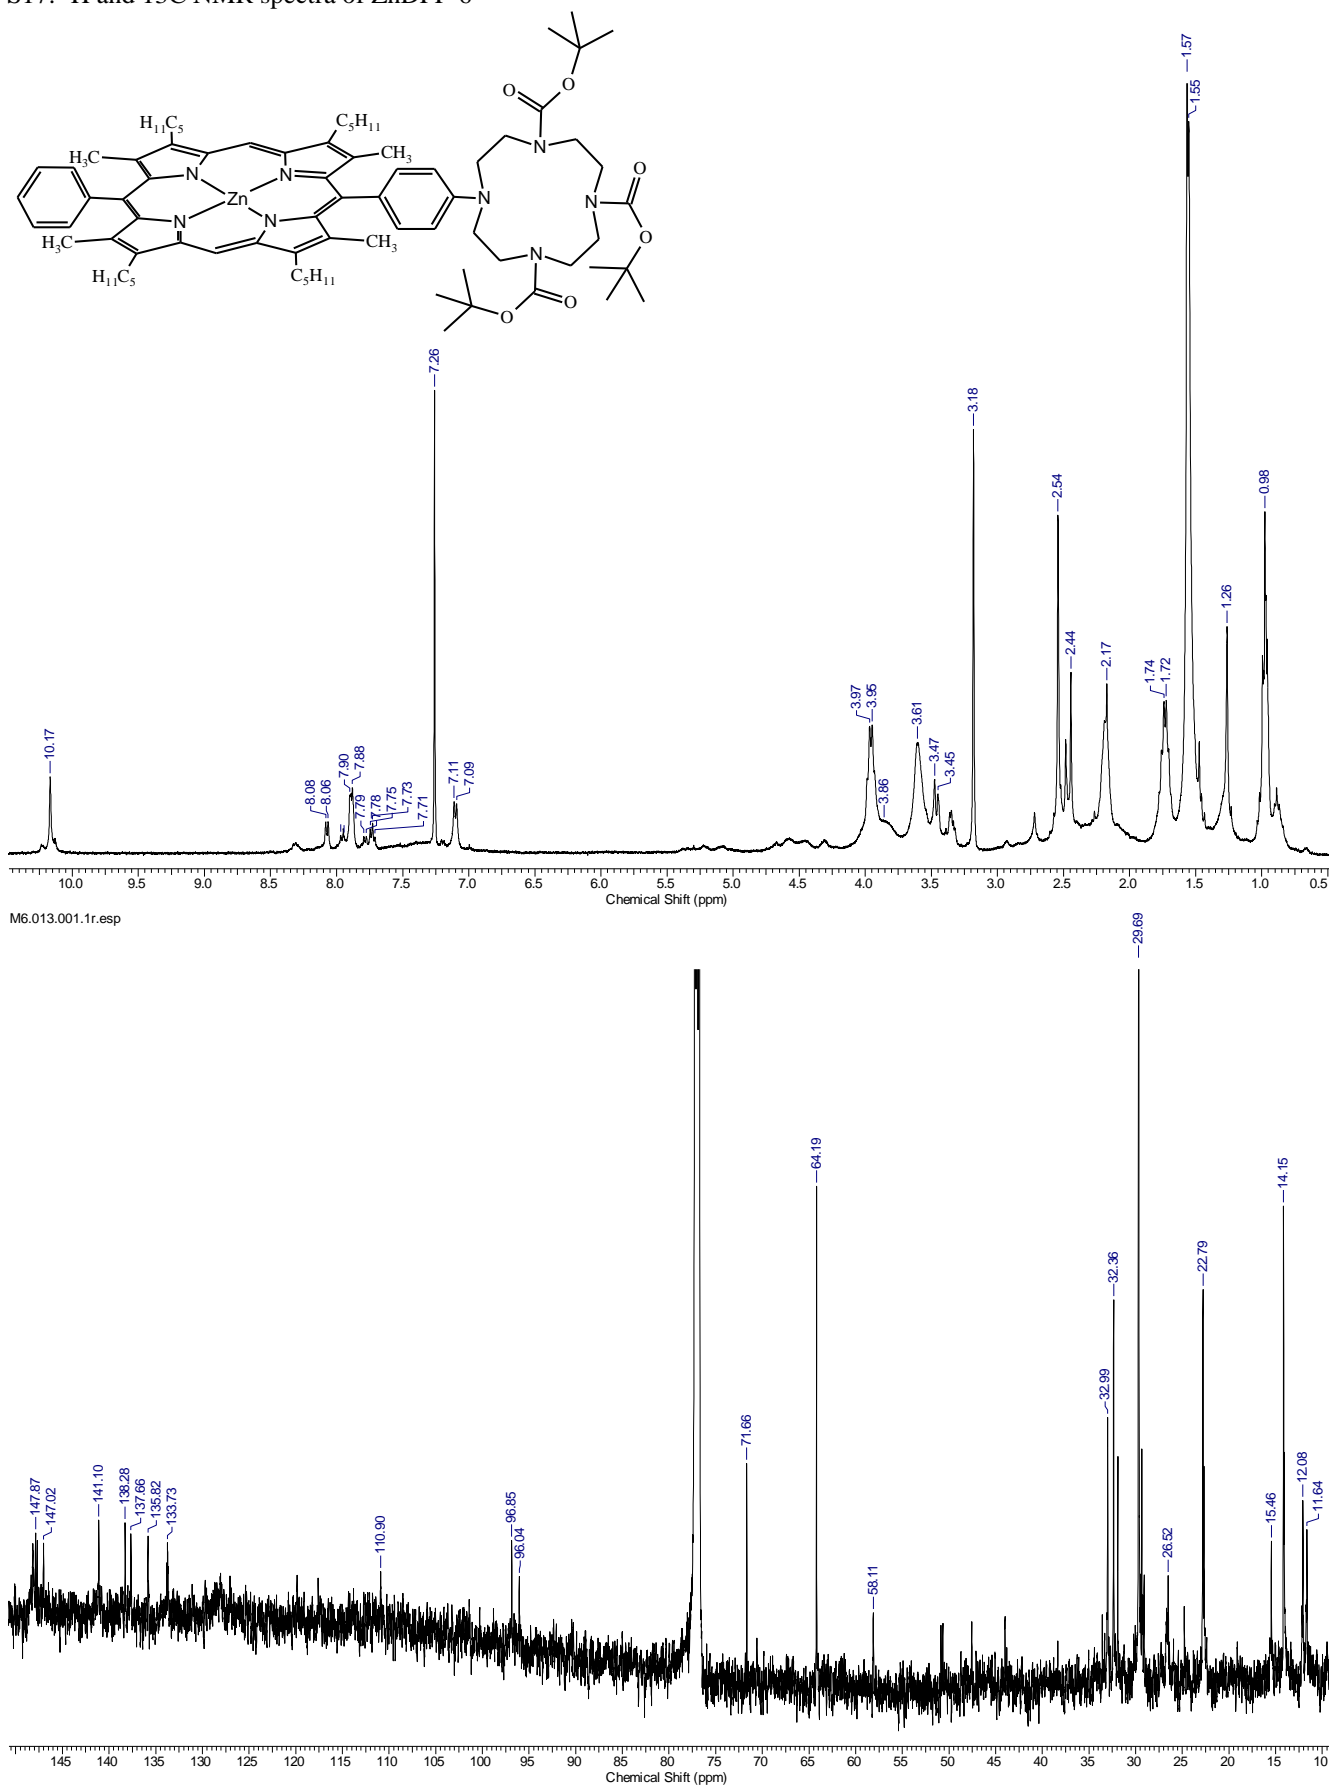

Supplement: c3dt52685b.pdf [file c3dt52685b.pdf]
